# Supplementary material for: Regioselective monochloro substitution in carbohydrates and non-sugar alcohols via Mitsunobu reaction: applications in the synthesis of reboxetine
Source: Royal Society of Chemistry journal article supplement (doi:10.1039/c3ob40853a), 2013-01-01

**Regioselective Monochloro-substitution in Carbohydrates and Non-sugar Alcohols via Mitsunobu Reaction: Applications in the Synthesis of Reboxetine**

**Abdul Rouf Dar, Mushtaq A. Aga, Brijesh Kumar, Syed Khalid Yousuf and Subhash Chandra Taneja \***

*CSIR-Indian Institute of Integrative Medicine, Canal Road, Jammu, India-180001*

*\*sctaneja@iiim.ac.in, drsctaneja@gmail.com*

**SUPPORTING INFORMATION**

|                                                                           |        |
|---------------------------------------------------------------------------|--------|
| Section A: List of known compounds and their references.....              | S2     |
| Optimization and schemes.....                                             | S3     |
| Section B: Copies of <sup>1</sup> H NMR, <sup>13</sup> C NMR Spectra..... | S4-S41 |

## Section A: List of known compounds and their references

| Entry | Compound No. in Manuscript | References                                                                                                                                                                        |
|-------|----------------------------|-----------------------------------------------------------------------------------------------------------------------------------------------------------------------------------|
| 1.    | <b>1a</b>                  | <i>Tetrahedron: Asymmetry</i> <b>2011</b> , 22, 658–661.                                                                                                                          |
| 2.    | <b>2a,3a</b>               | <i>Heterocycles</i> <b>1991</b> , 32, 1587.                                                                                                                                       |
| 3.    | <b>4a</b>                  | <i>Tetrahedron: Asymmetry</i> <b>2009</b> , 20, 2287–2292.                                                                                                                        |
| 4.    | <b>1b</b>                  | <i>Bioorganic &amp; Medicinal Chemistry letters</i> , <b>1997</b> , 7, 225–228.                                                                                                   |
| 5.    | <b>4b</b>                  | Patent-WO 02/092602 A2                                                                                                                                                            |
| 6.    | <b>1c</b>                  | <i>Tetrahedron: Asymmetry</i> <b>2008</b> , 19, 1455–1460.                                                                                                                        |
| 7.    | <b>1d</b>                  | <i>Organic Letters</i> <b>2012</b> , 14, 2626                                                                                                                                     |
| 8.    | <b>2d</b>                  | <i>Synthesis</i> <b>2006</b> , 1427.<br><i>Tetrahedron: Asymmetry</i> <b>2006</b> , 17, 1561–1567.                                                                                |
| 9.    | <b>3d</b>                  | <i>J. Org. Chem.</i> <b>2012</b> , 77, 1722–1737.                                                                                                                                 |
| 10.   | <b>1e</b>                  | <i>Tetrahedron</i> <b>2009</b> , 65, 2966–2974.                                                                                                                                   |
| 11.   | <b>3e</b>                  | <i>Journal of Chemical Research, Synopses</i> <b>1987</b> , 12, 400–401.                                                                                                          |
| 12.   | <b>1g</b>                  | <i>Tetrahedron</i> <b>1985</b> , 41, 1393–1399.                                                                                                                                   |
| 13.   | <b>1h</b>                  | Patent-JP 1992-315212, 19921125. PCT WO93/05763                                                                                                                                   |
| 14.   | <b>3h</b>                  | <i>Eur. J. Org. Chem.</i> <b>2007</b> , 2100–2106.                                                                                                                                |
| 15.   | <b>1i</b>                  | <i>Tetrahedron letters</i> <b>2006</b> , 47, 5285<br><i>Journal of Molecular Catalysis A: Chemical</i> <b>2005</b> , 238, 229–232.                                                |
| 16.   | <b>1j</b>                  | <i>Helvetica Chimica Acta</i> <b>1964</b> , 47, 398–407.<br><i>Organic Letters</i> <b>2012</b> , 14, 2142–2145.                                                                   |
| 17.   | <b>3j</b>                  | <i>Carbohydrate Research</i> <b>1988</b> , 177, 247–252.                                                                                                                          |
| 18.   | <b>1k</b>                  | <i>Journal of Molecular Catalysis A: Chemical</i> <b>2005</b> , 238, 229–232.<br><i>Synlett</i> <b>2000</b> , 110–112.<br><i>Tetrahedron Letters</i> <b>2005</b> , 46, 7439–7441. |
| 19.   | <b>1l</b>                  | <i>Carbohydrate Research</i> <b>2004</b> , 339, 385–392.<br><i>J. Chem. Soc., Perkin Trans. 1</i> <b>1998</b> , 1069–1080.                                                        |
| 20.   | <b>1m</b>                  | <i>J. carbohydrate chemistry</i> , <b>1998</b> , 17, 439–452.                                                                                                                     |
| 21.   | <b>1n</b>                  | <i>Carbohydrate Research</i> <b>2004</b> , 339, 385–392.<br><i>J. Chem. Soc., Perkin Trans. 1</i> <b>1998</b> , 1069–1080.                                                        |
| 22.   | <b>3n</b>                  | <i>Journal of Organic Chemistry</i> <b>2002</b> , 67, 3733–3741.                                                                                                                  |
| 23.   | <b>14</b>                  | <i>Agric. Biol. Chem.</i> <b>1984</b> , 48, 1841–1844.                                                                                                                            |
| 24.   | <b>15</b>                  | <i>Chem. Eur. J.</i> <b>2009</b> , 15, 1713–1722.                                                                                                                                 |
| 25.   | <b>1g</b>                  | <i>Tetrahedron</i> <b>1985</b> , 41, 1393–1399.                                                                                                                                   |
| 26.   | <b>18</b>                  | <i>Green Chem.</i> 2012, 14, 123–129                                                                                                                                              |
| 27.   | <b>19</b>                  | <i>Tetrahedron: Asymmetry</i> <b>2012</b> , 23, 650–654.                                                                                                                          |
| 28.   | <b>20</b>                  | Patent- Offenlegungsschrift 2921973, <b>1980</b> .                                                                                                                                |

Table 1. Optimization of solvents for Mitsunobu reaction

| Entry | Substrate                                                                         | Solvent | Time (h) | Product (%) |
|-------|-----------------------------------------------------------------------------------|---------|----------|-------------|
| 1     | 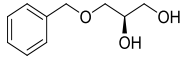 | DCM     | 3        | 88          |
| 2     |                                                                                   | THF     | 2.5      | 85          |
| 3     |                                                                                   | Toluene | 2        | 92          |
| 4     |  | DCM     | 3        | 92          |
| 5     |                                                                                   | THF     | 3        | 92          |
| 6     |                                                                                   | Toluene | 2        | 95          |

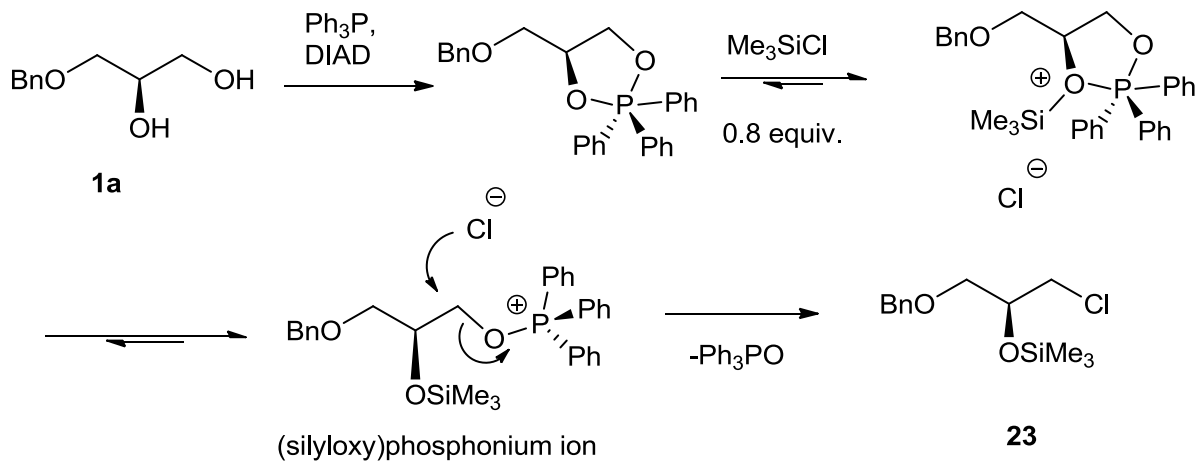

Scheme 1. Mitsunobu reaction in (*R*)-3-(benzyloxy)propanediol

## Section B: Copies of $^1\text{H}$ NMR, $^{13}\text{C}$ NMR Spectra

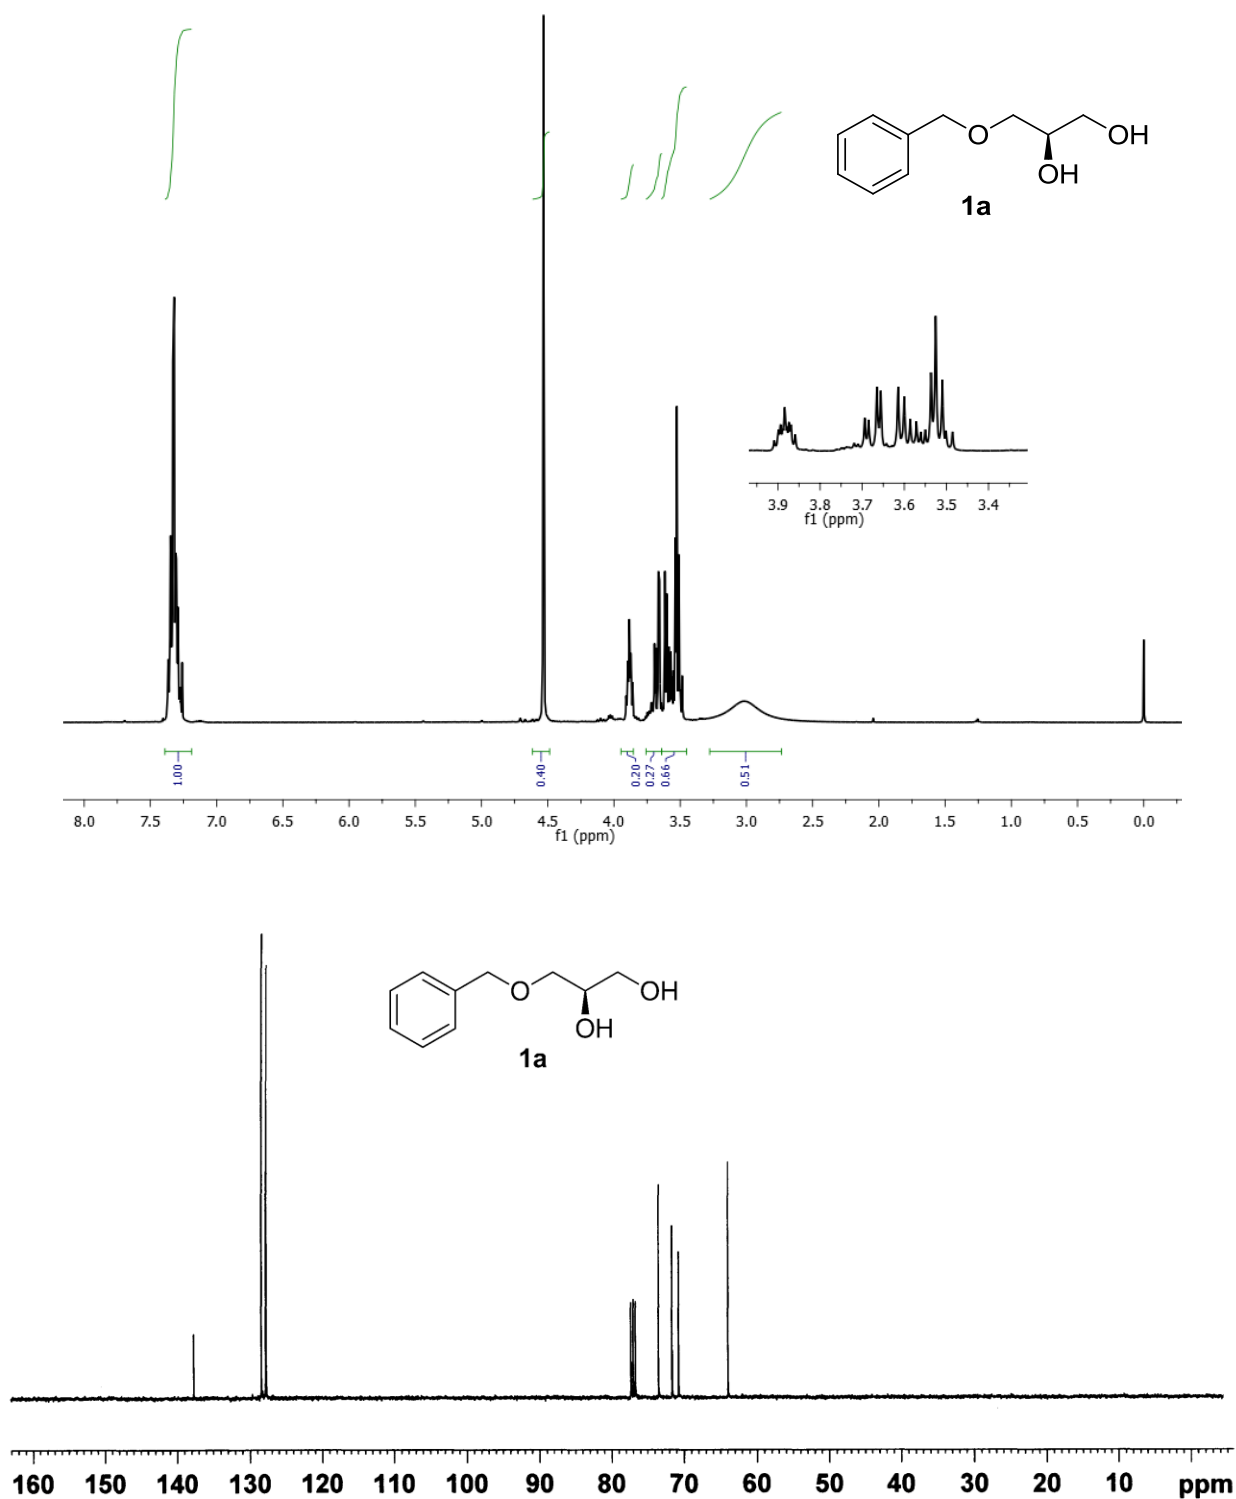

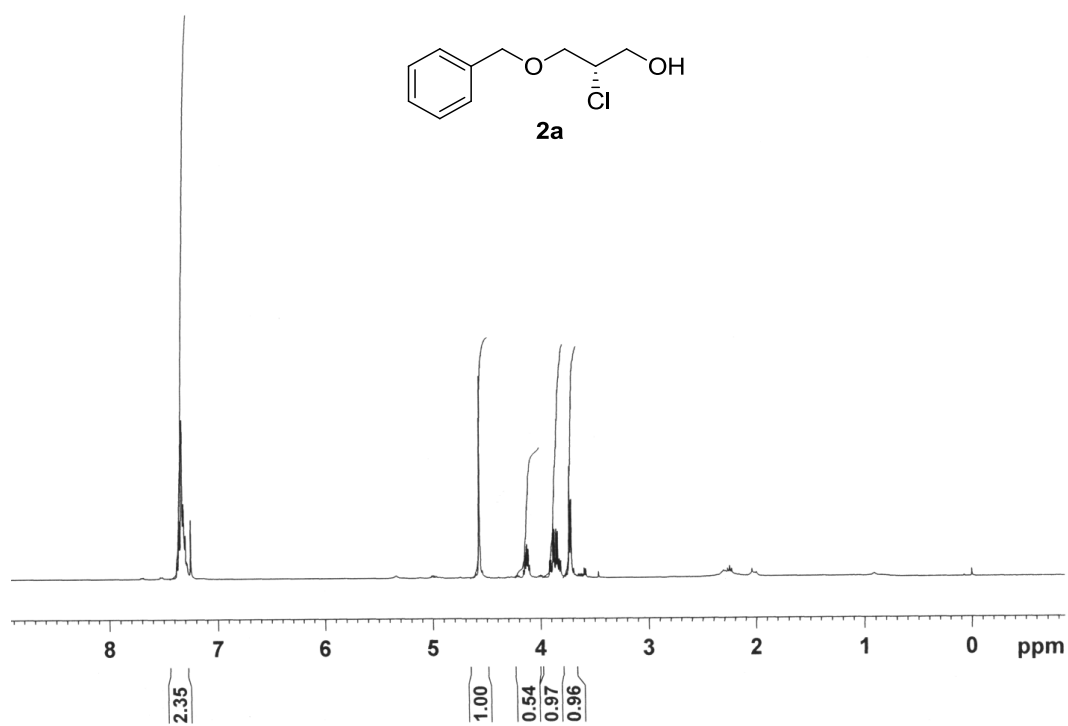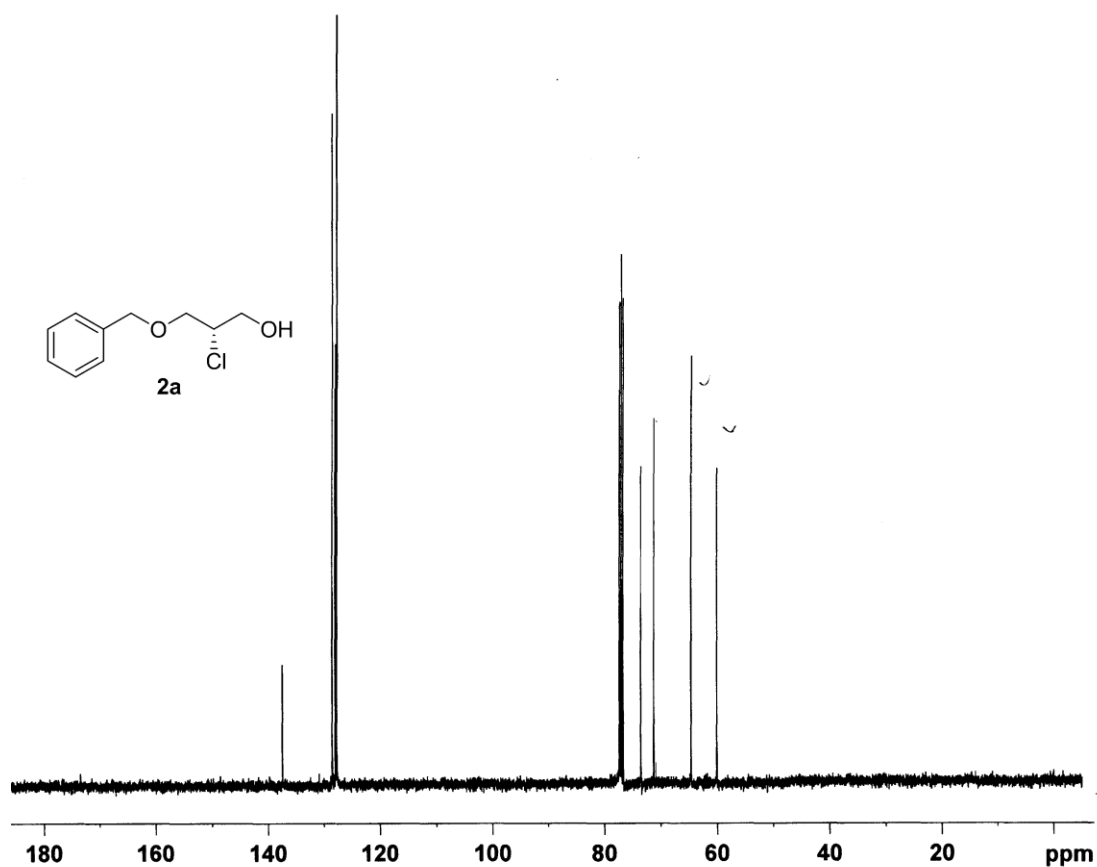

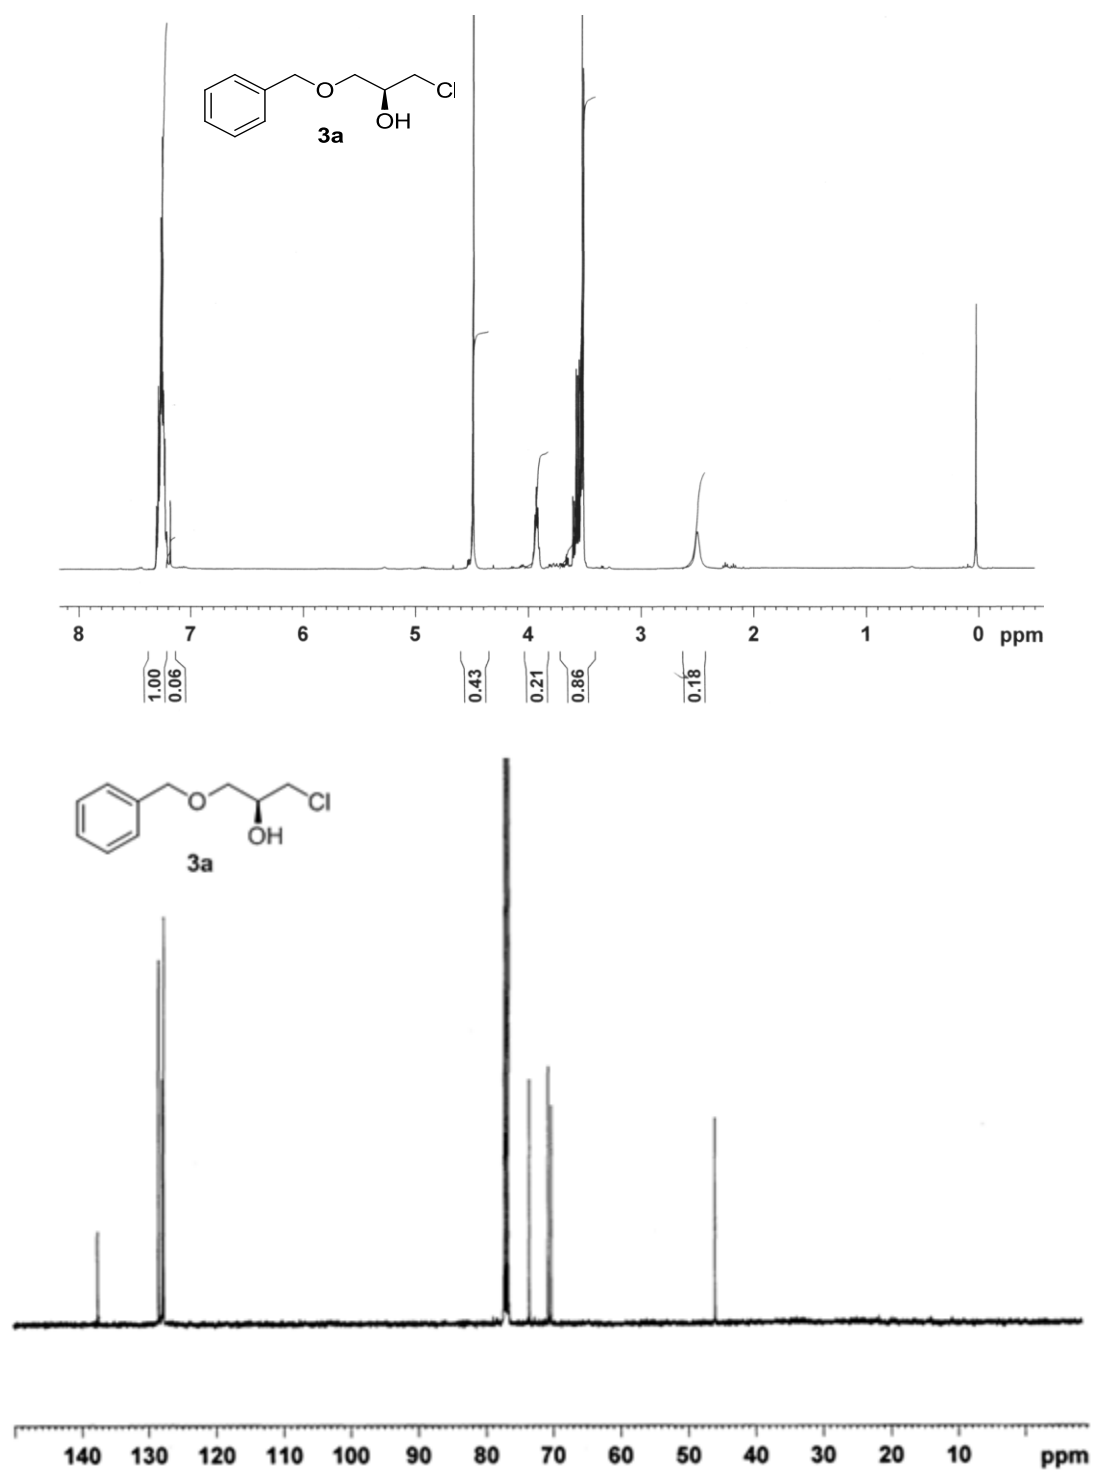

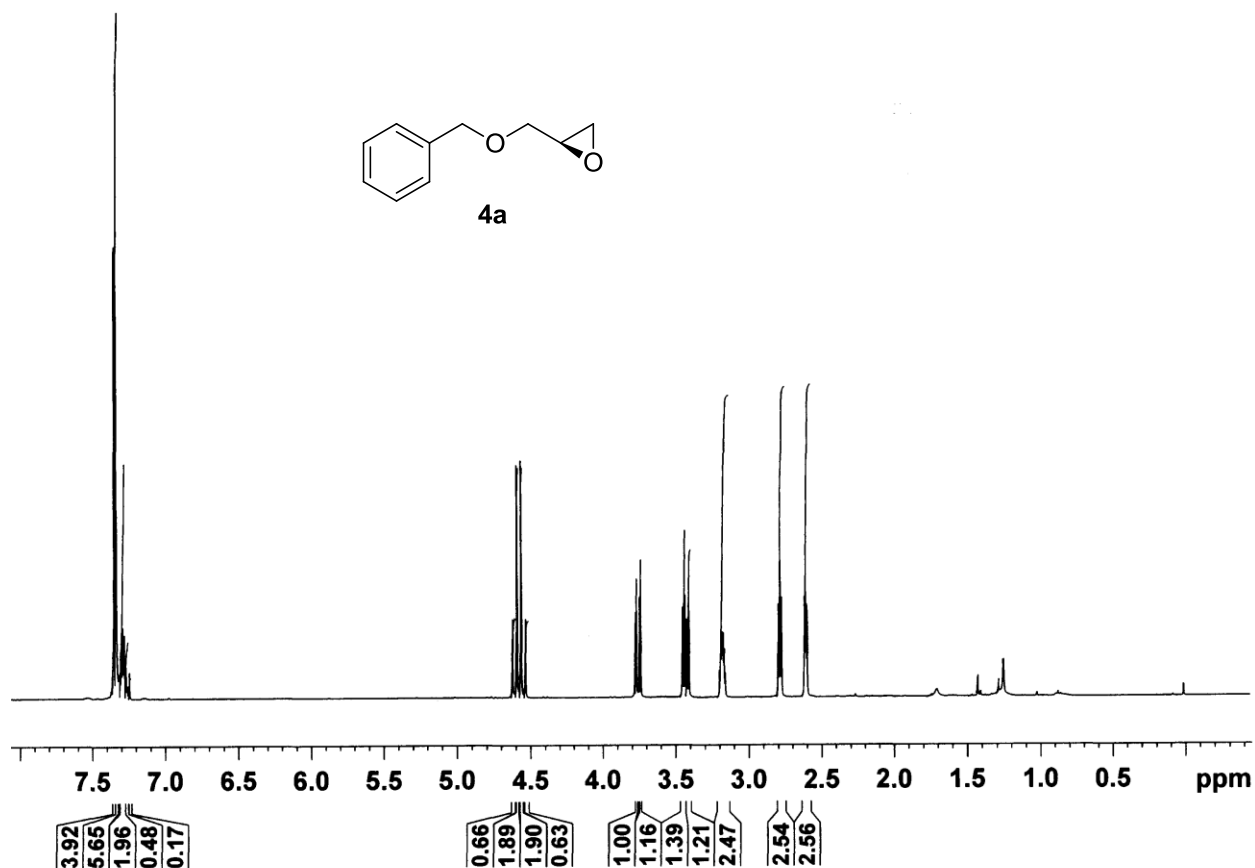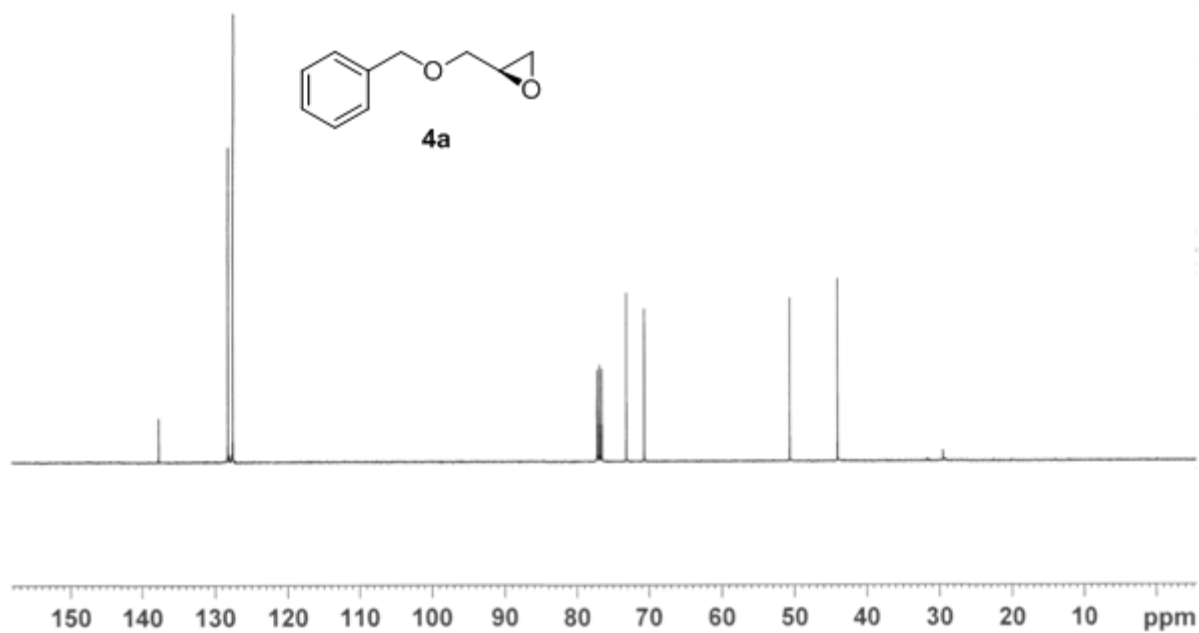

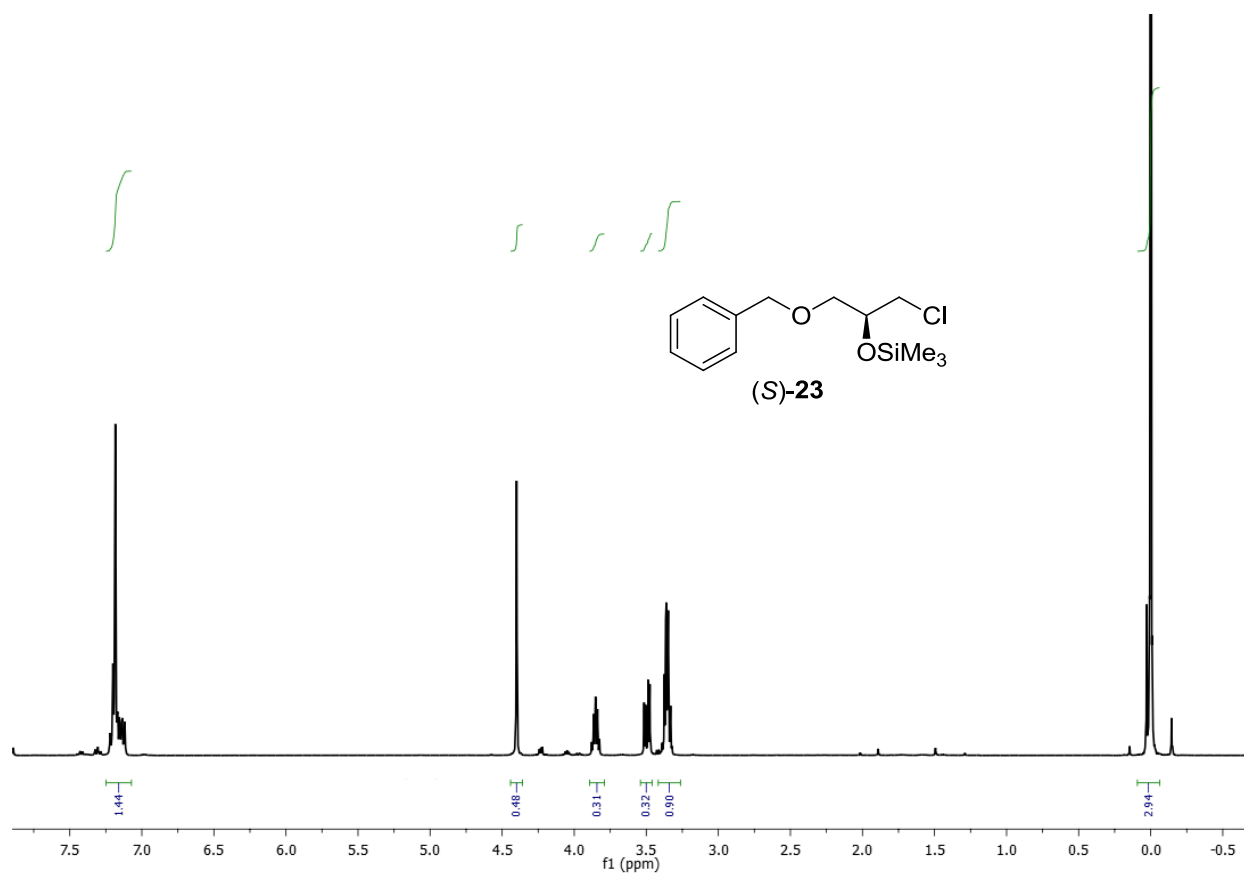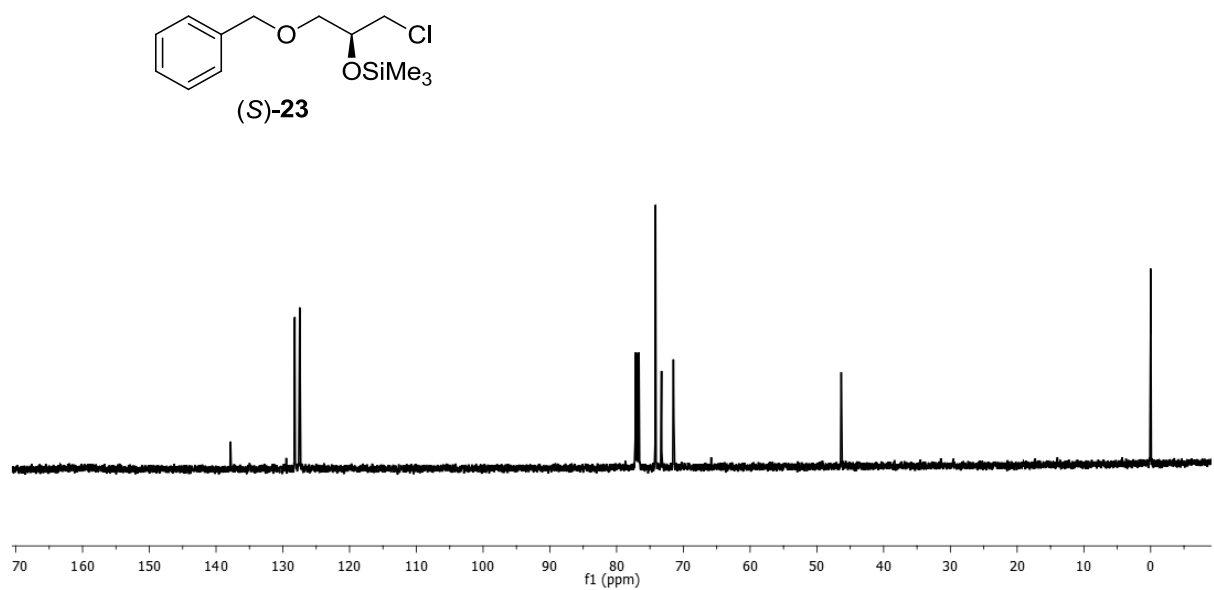



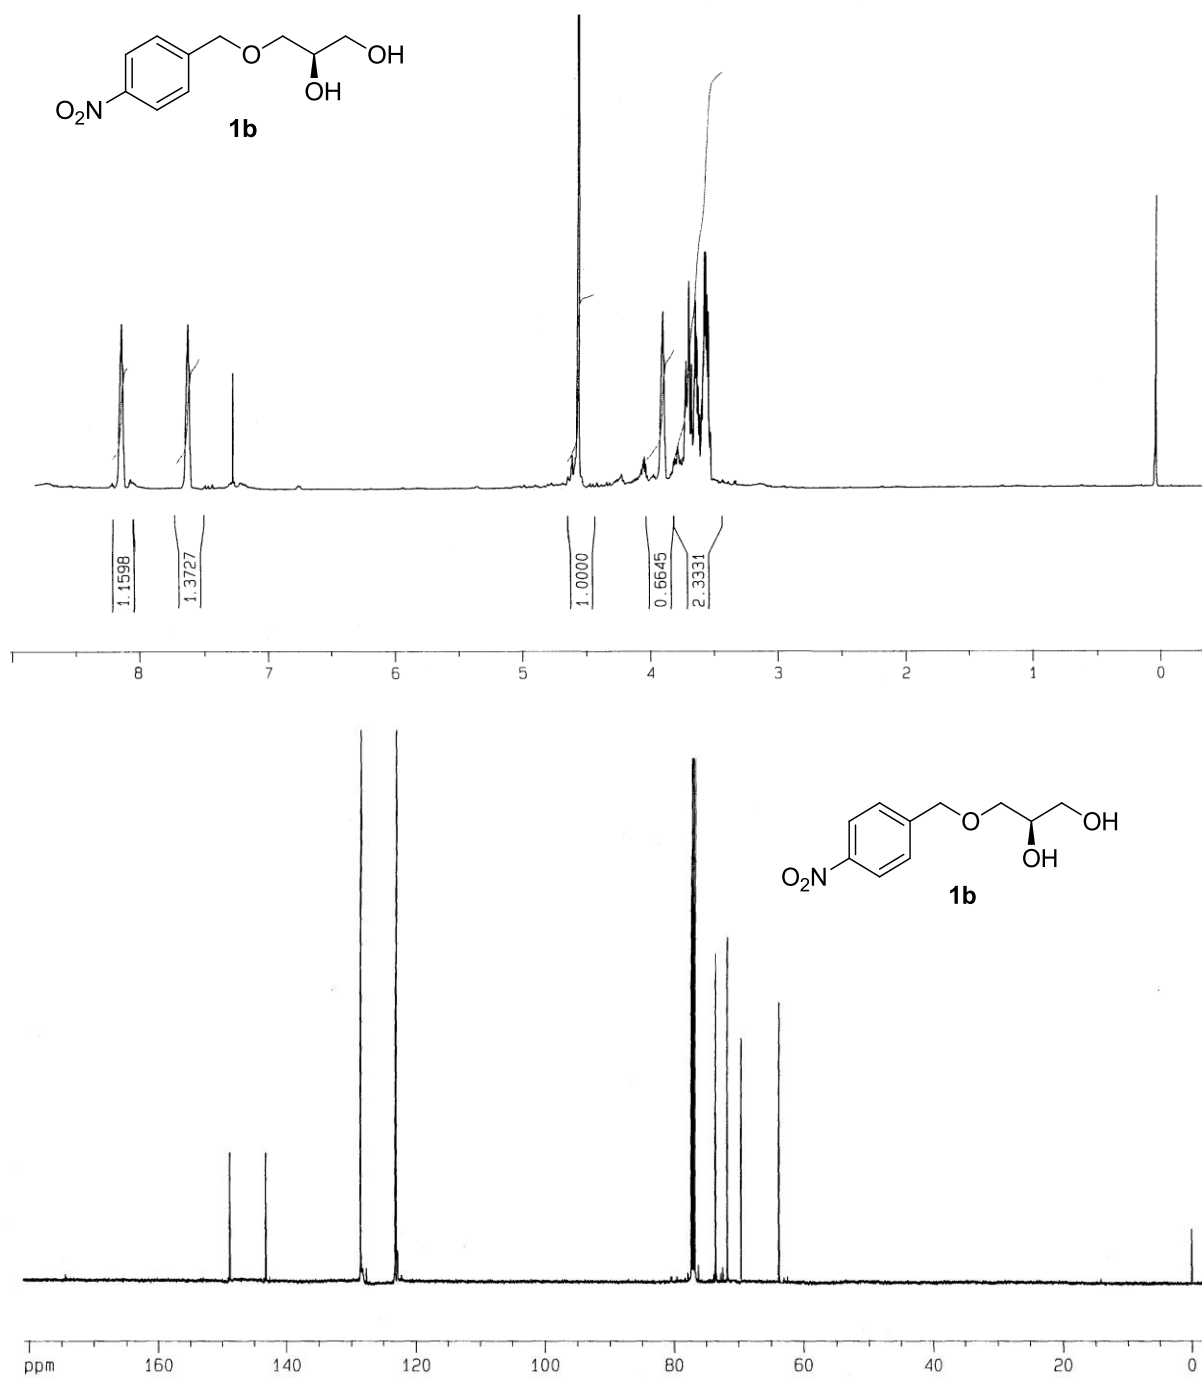

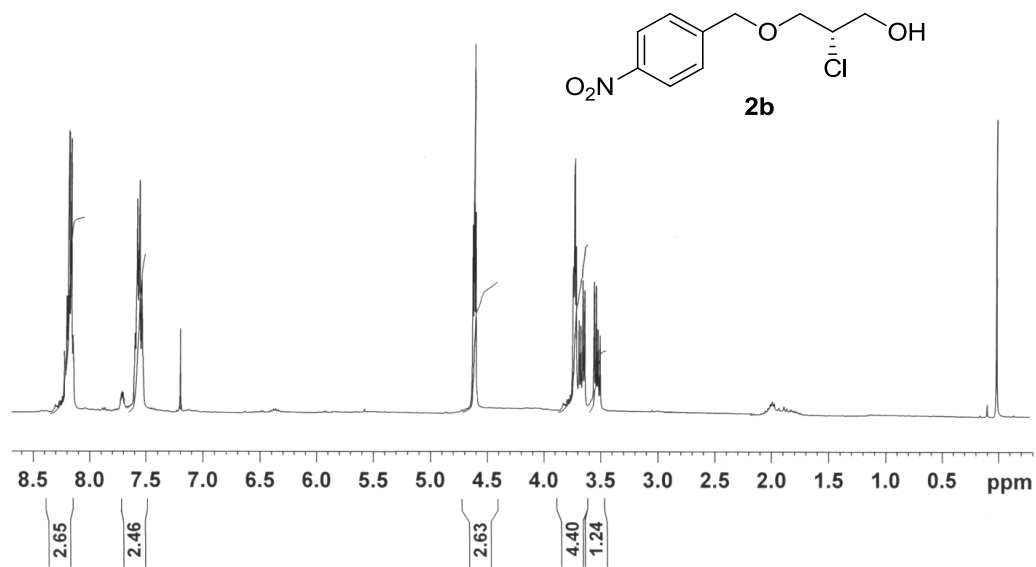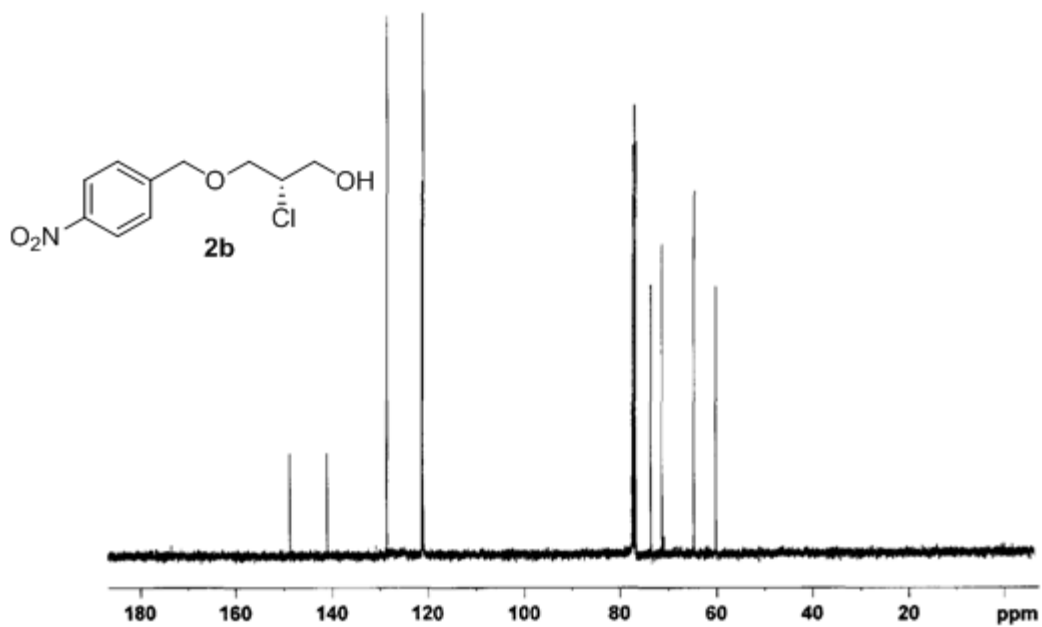

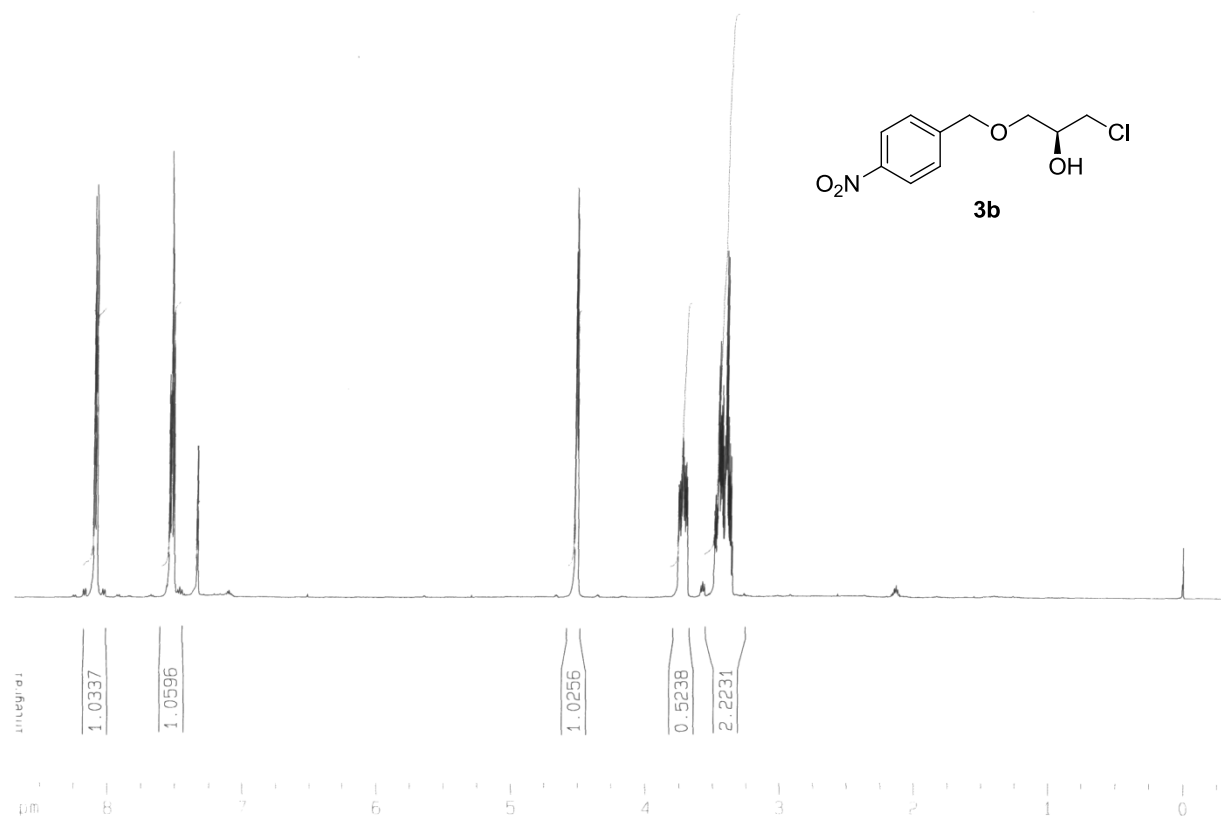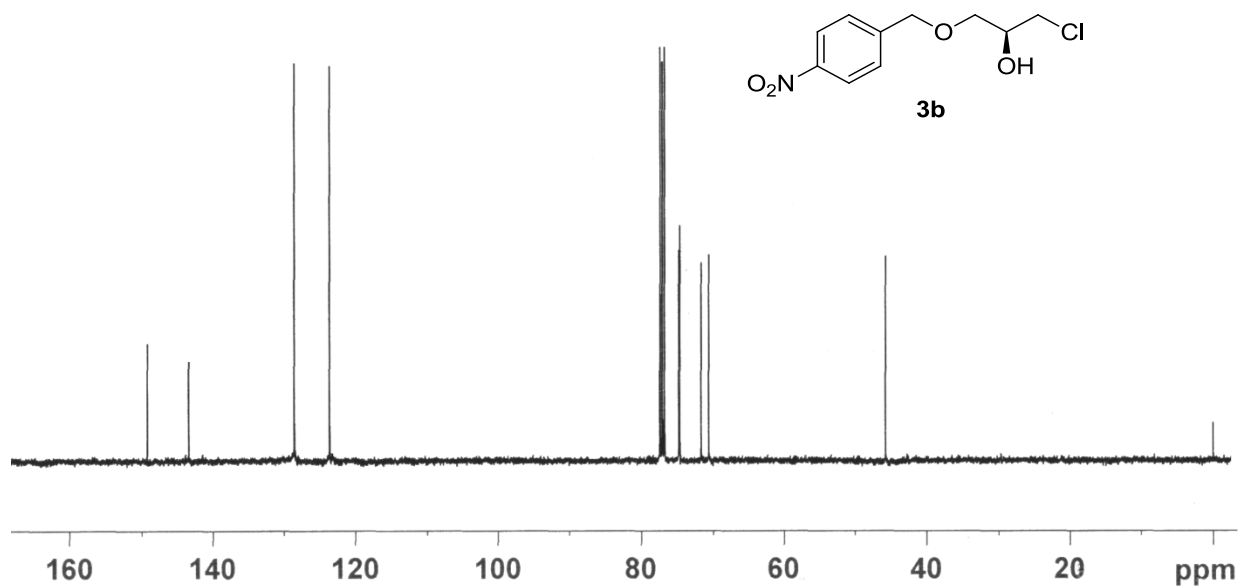

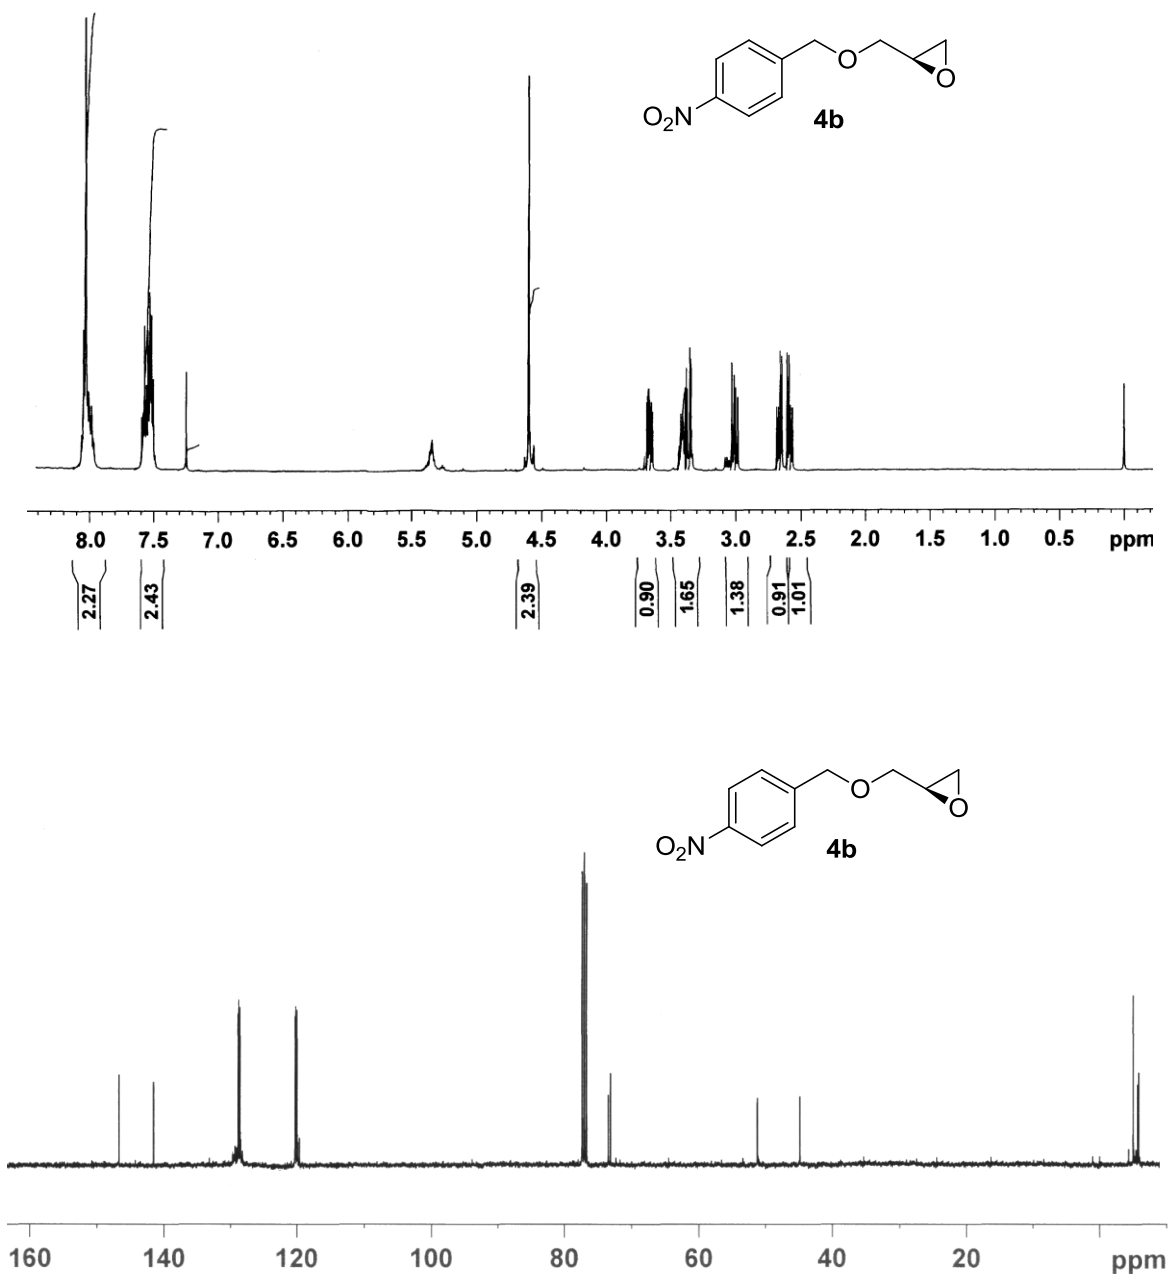

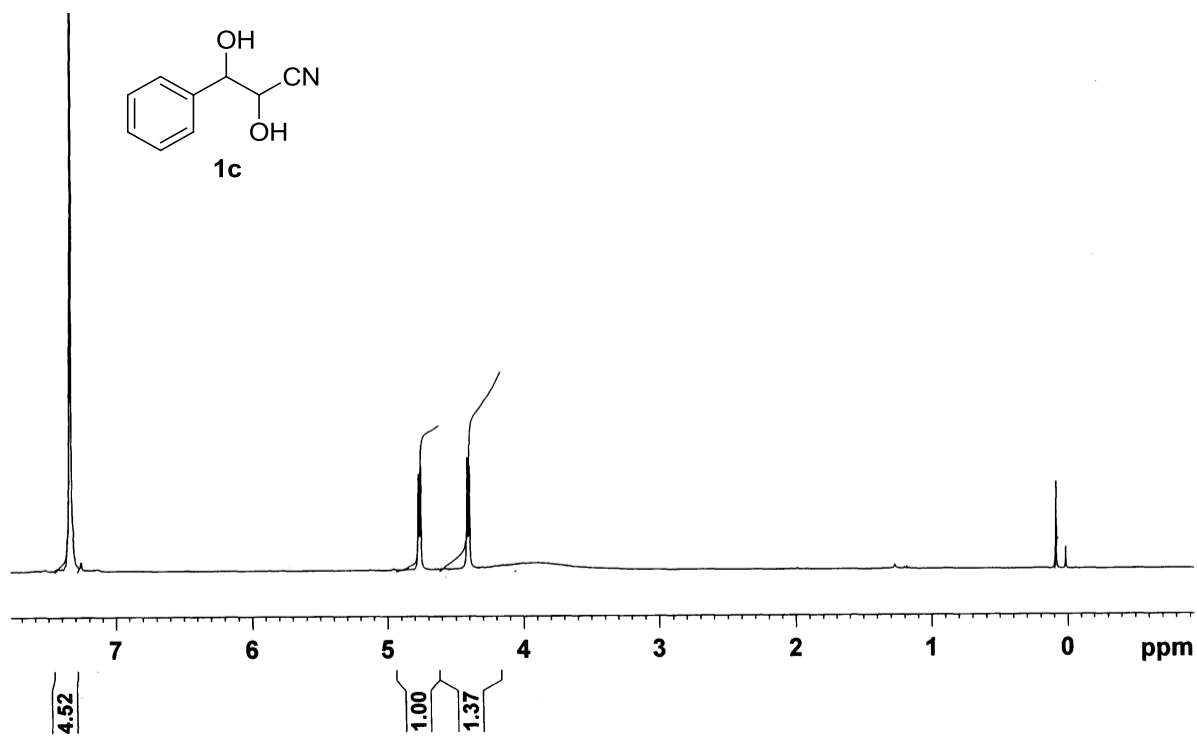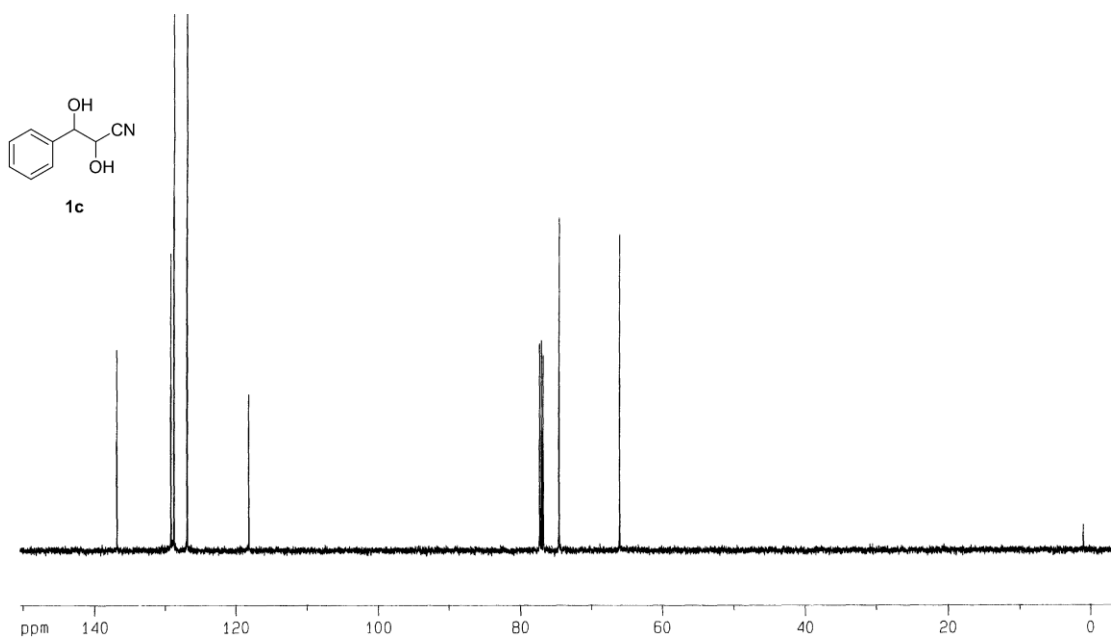

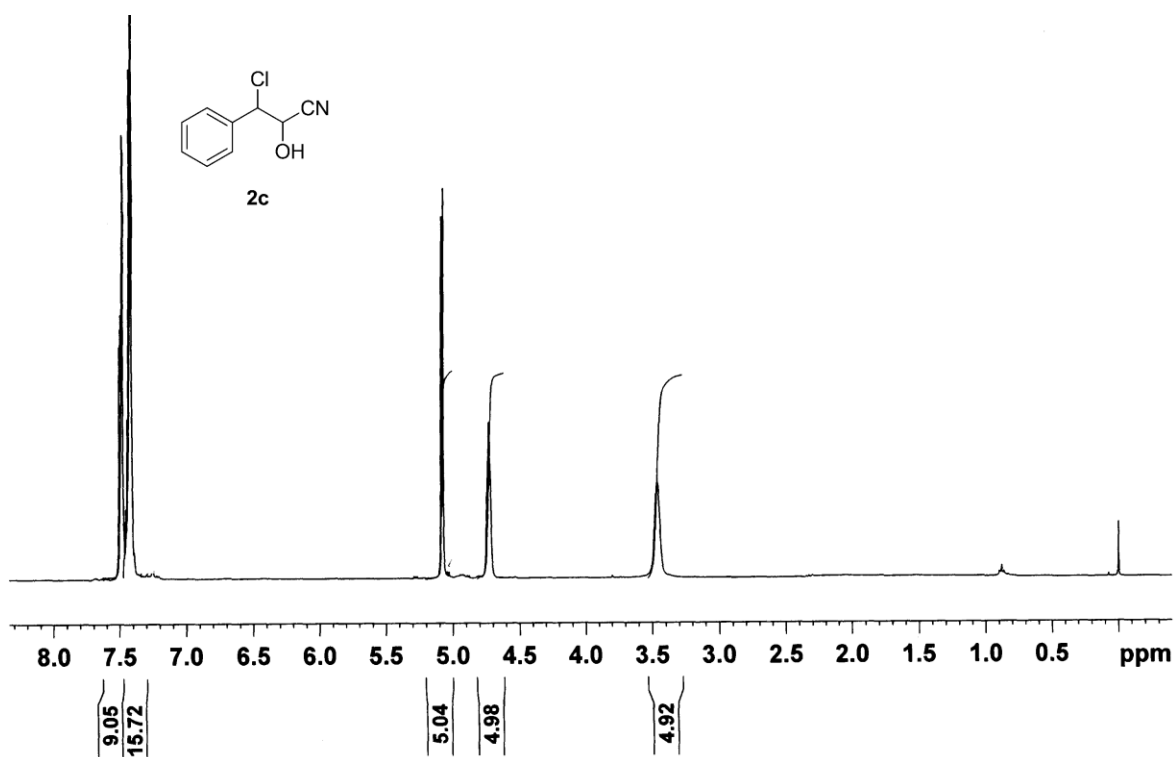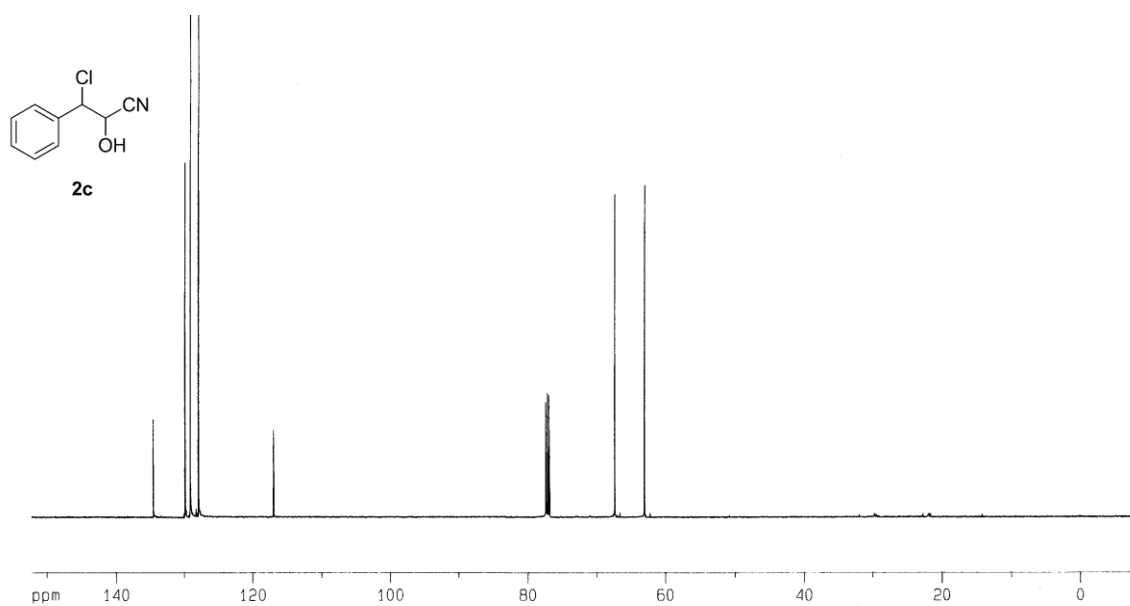

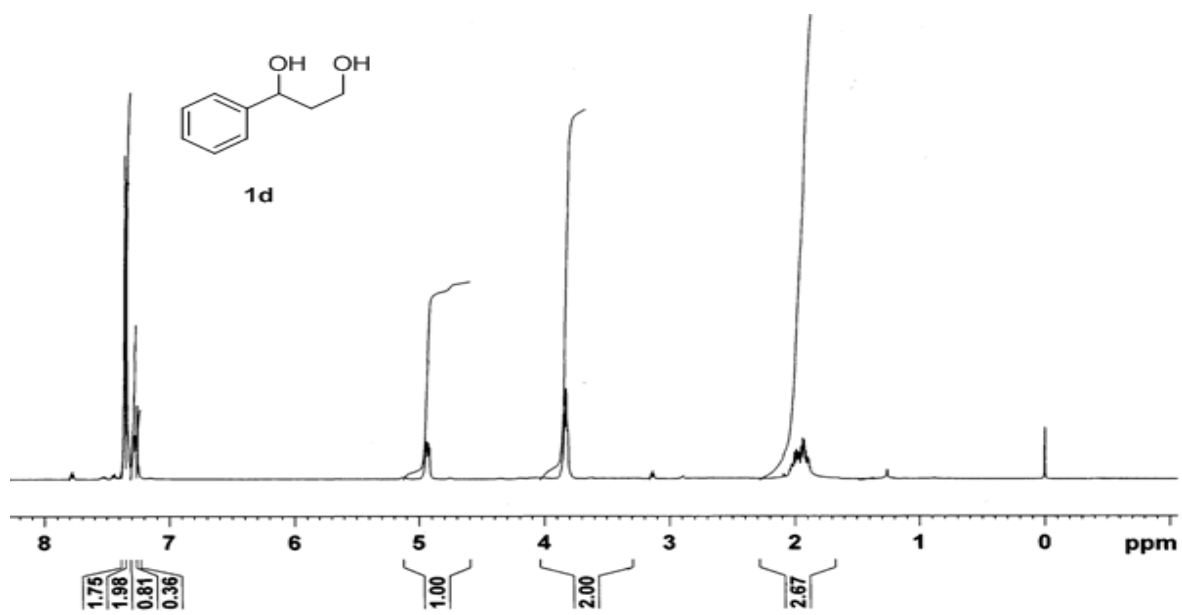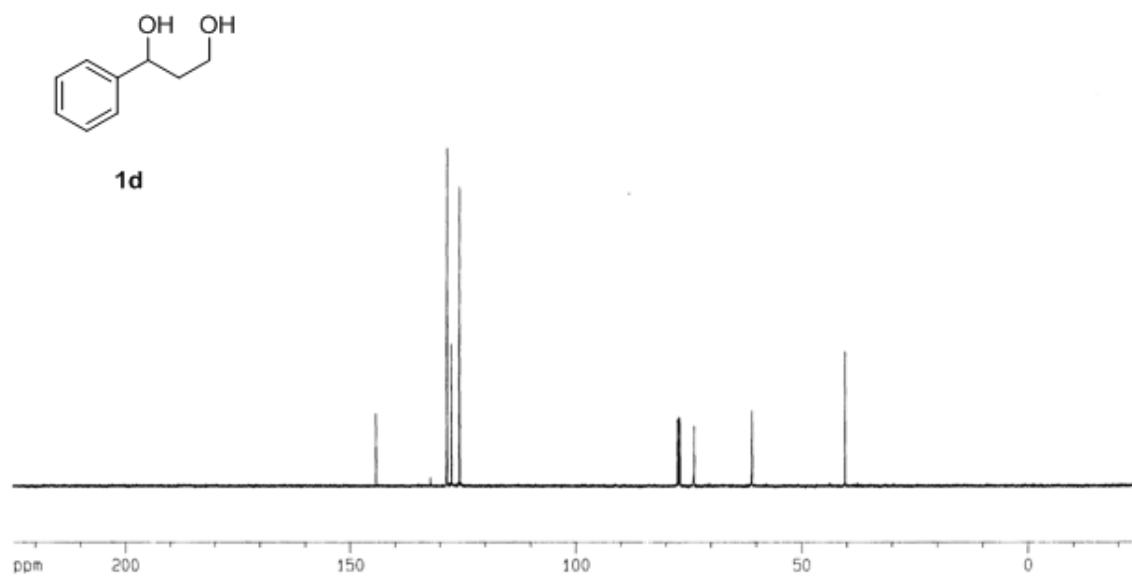

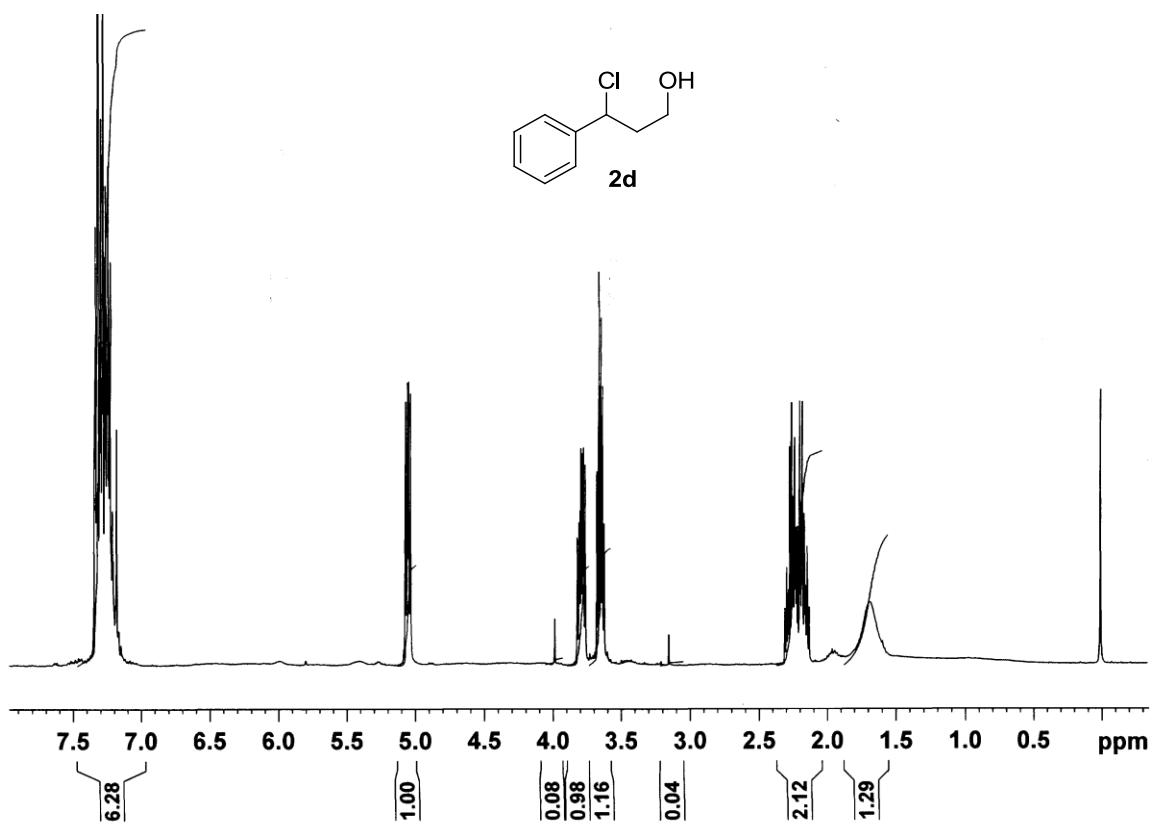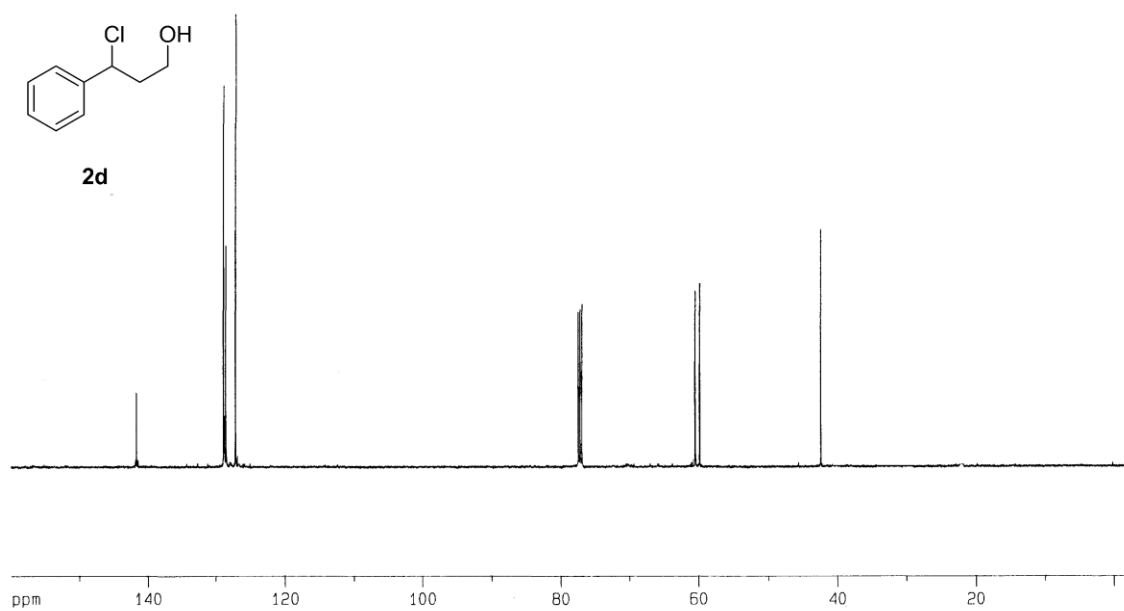



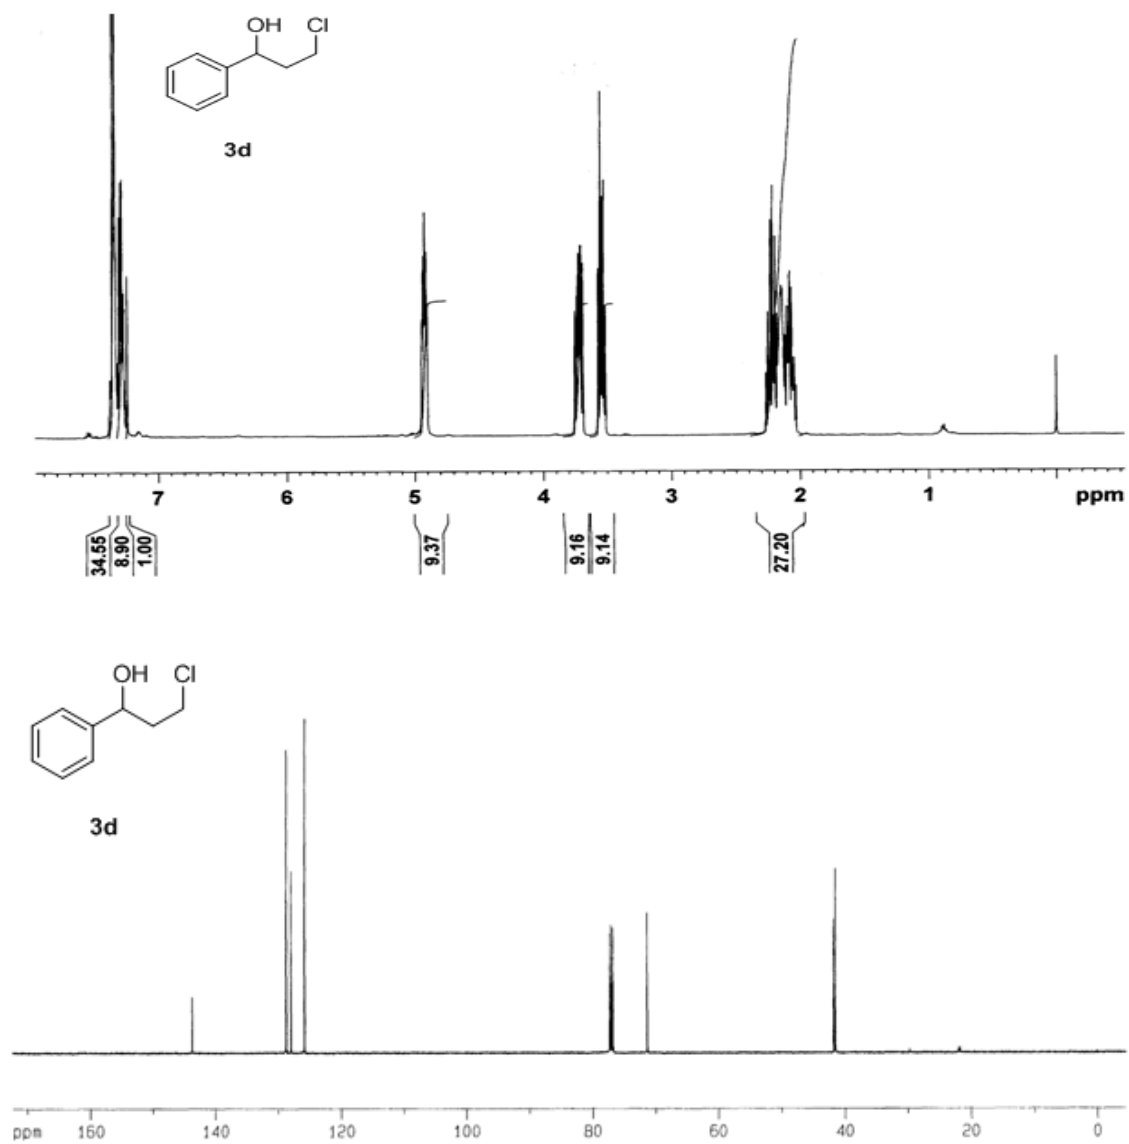

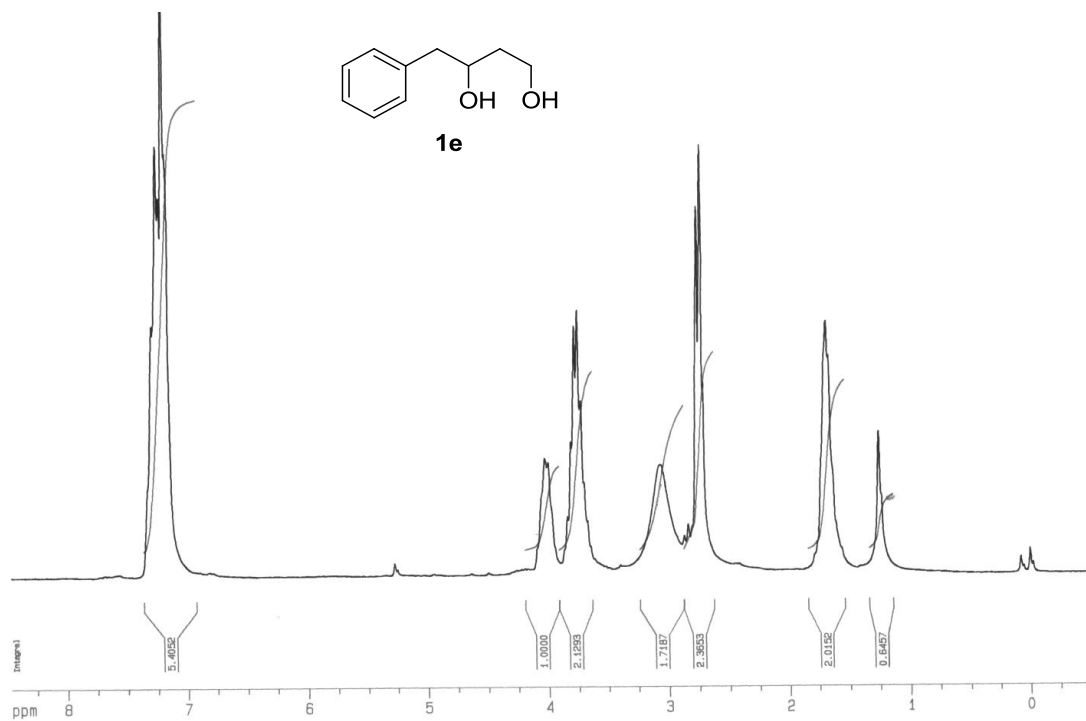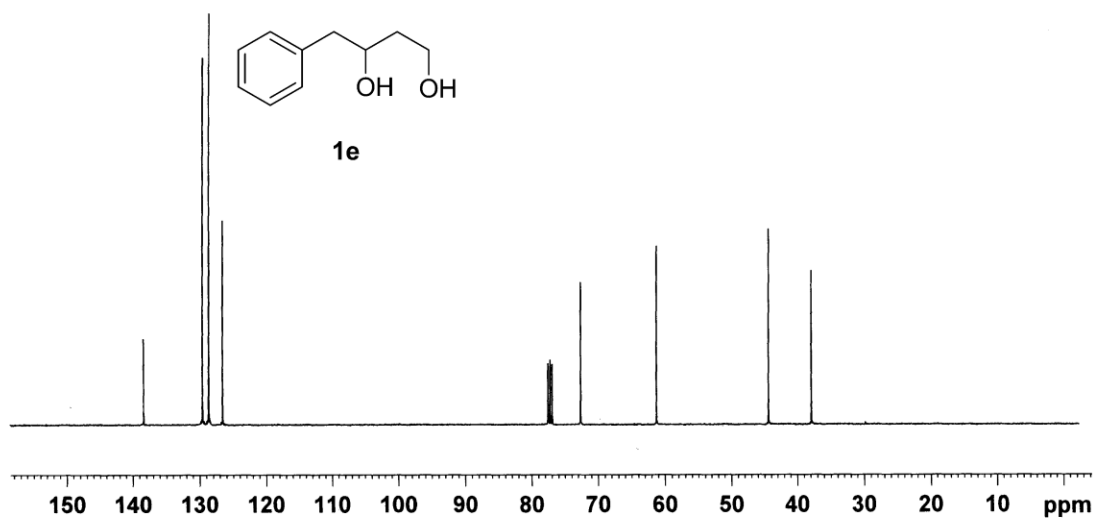

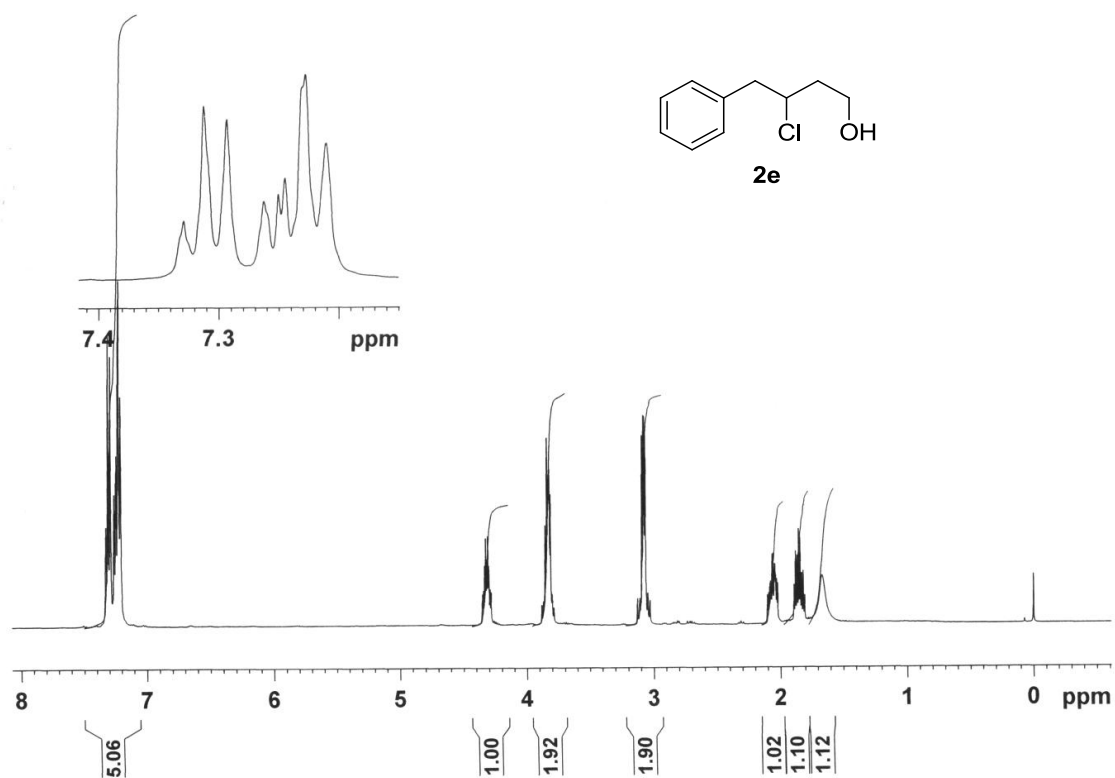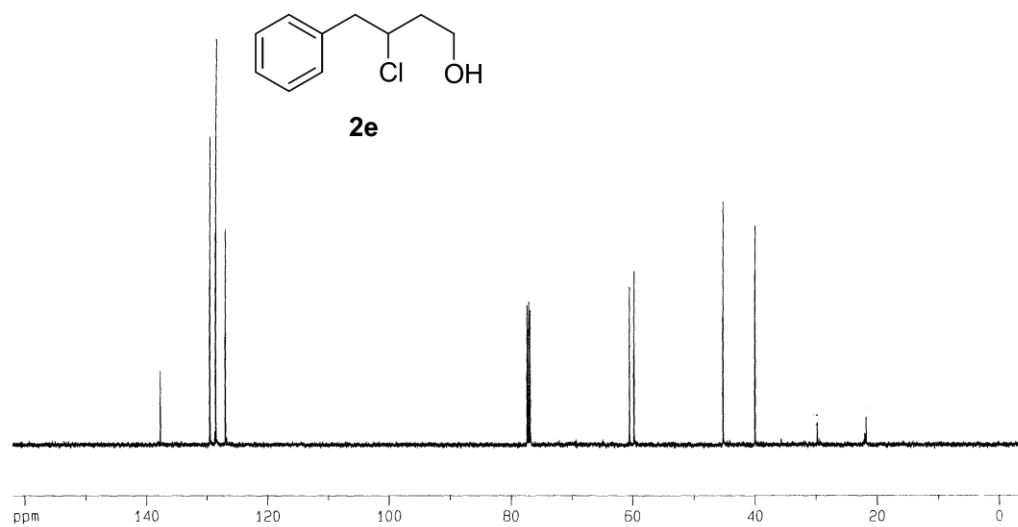

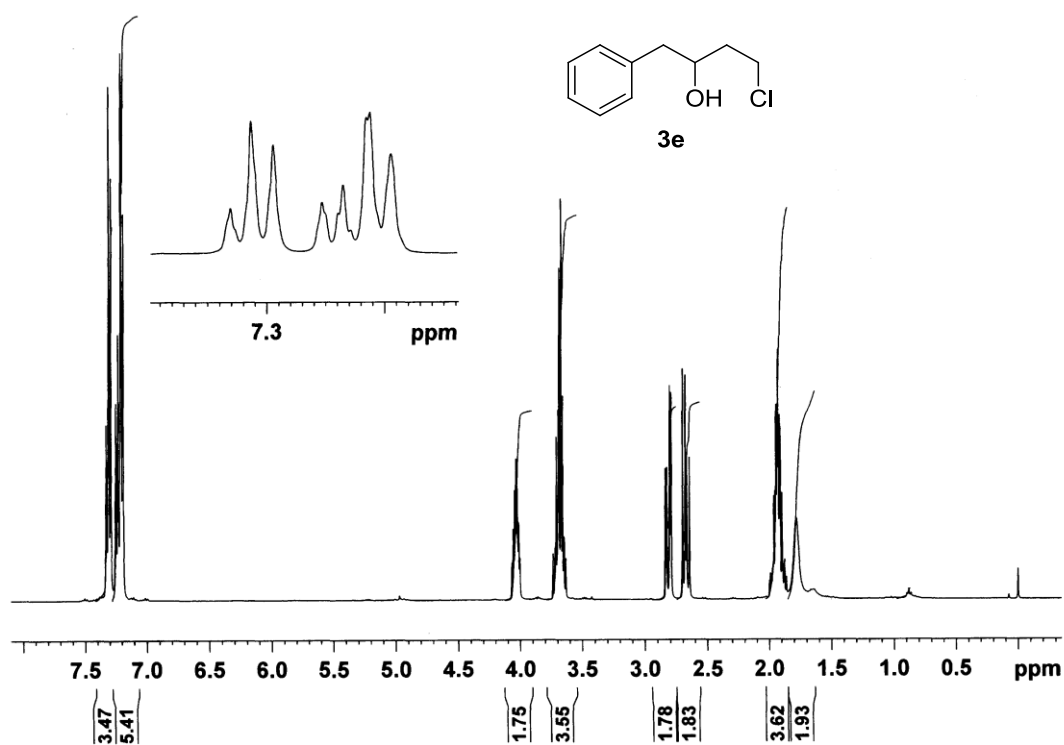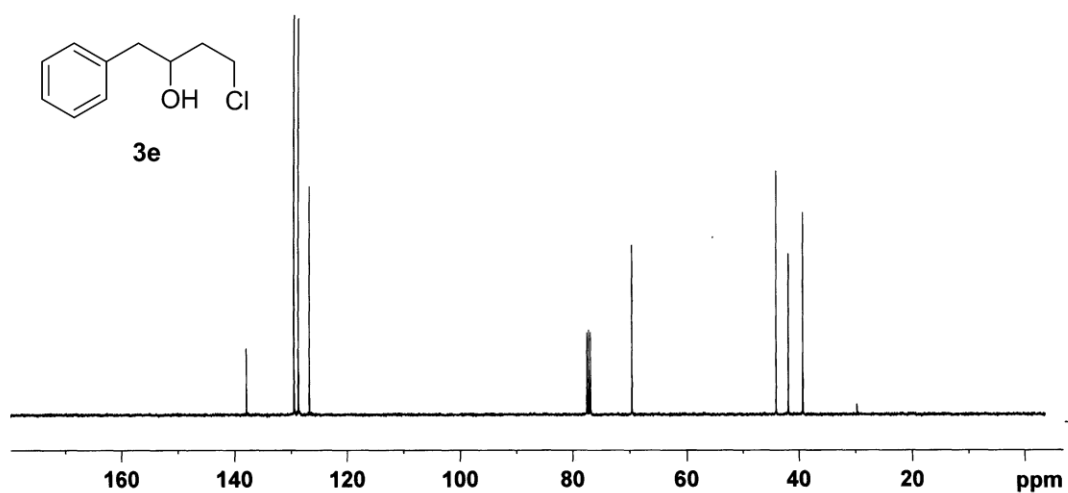

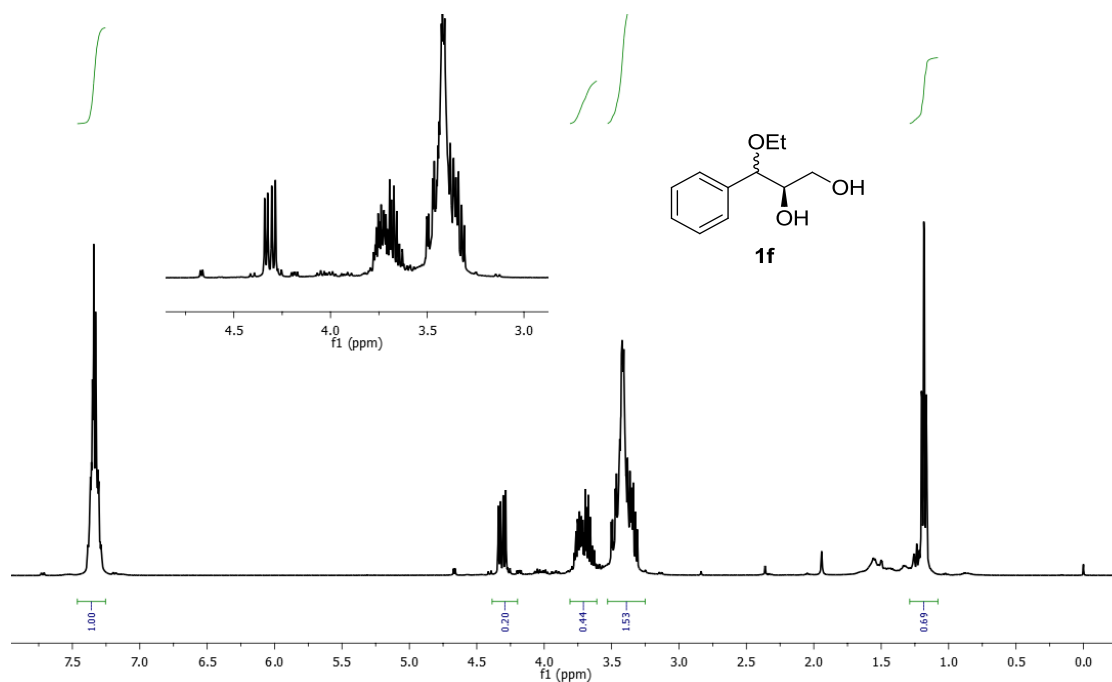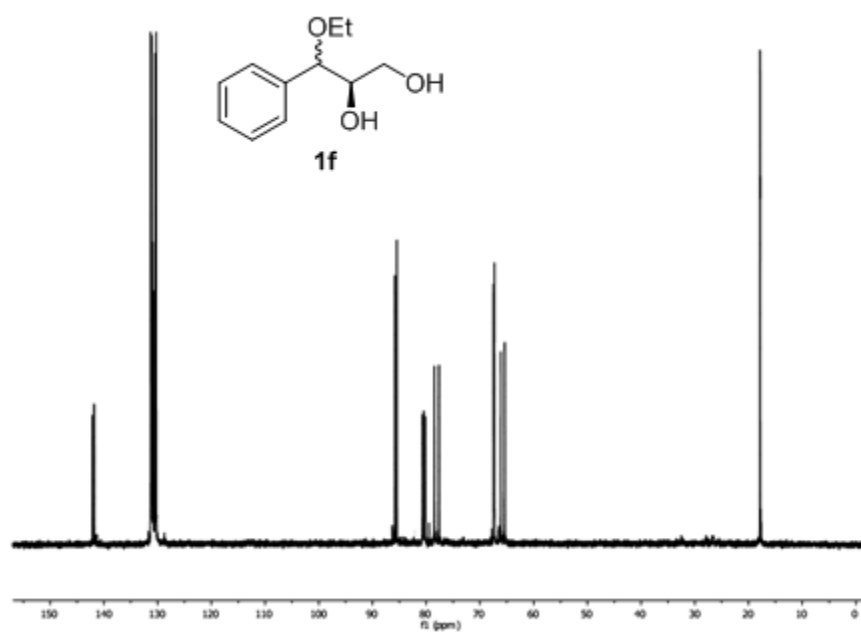

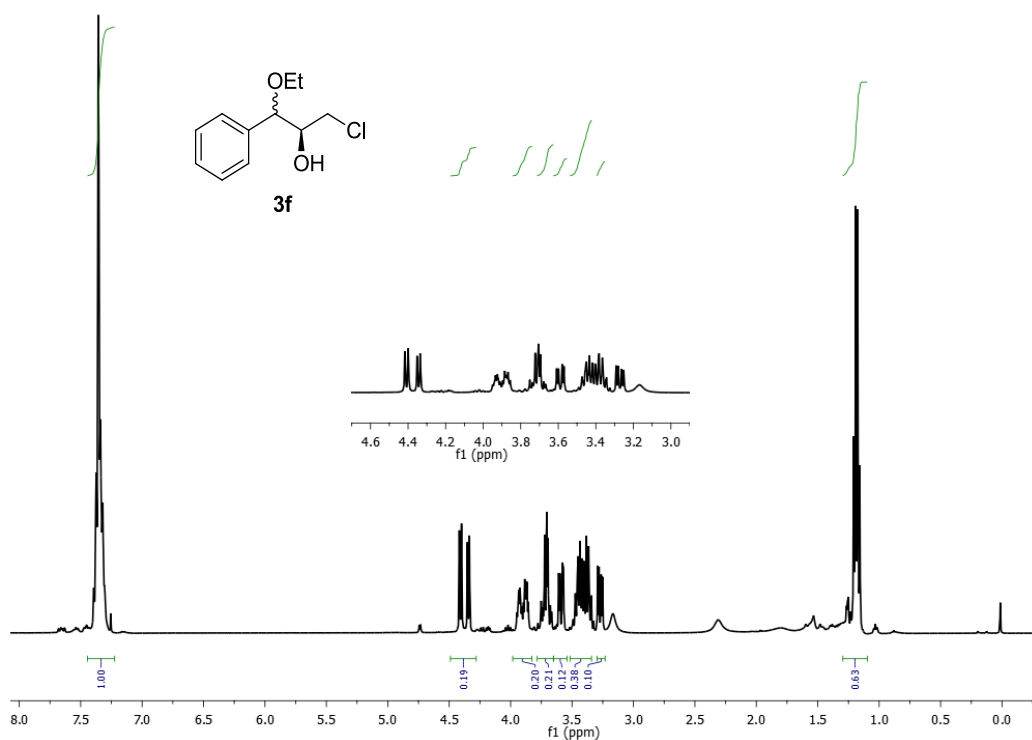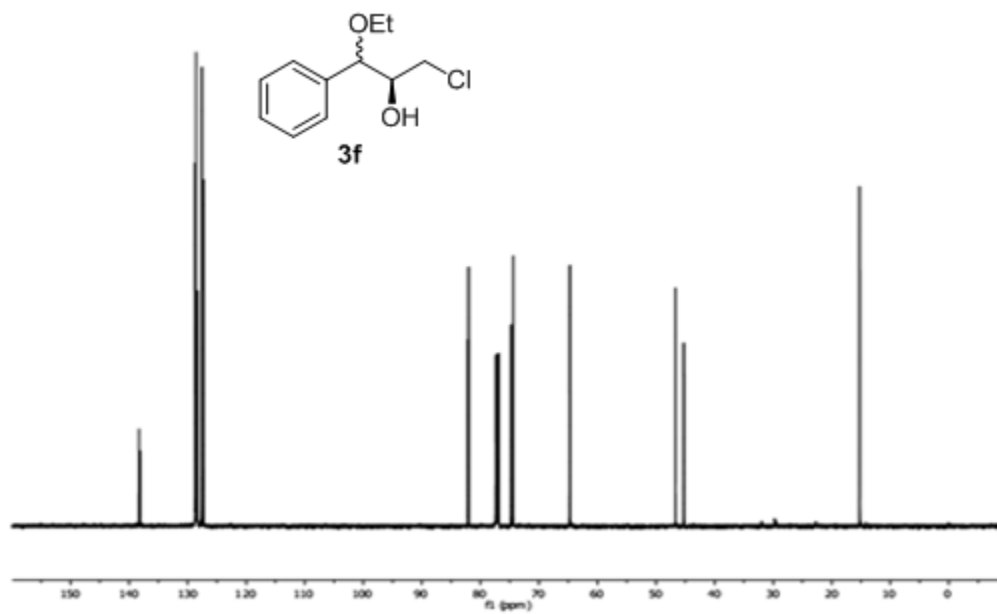

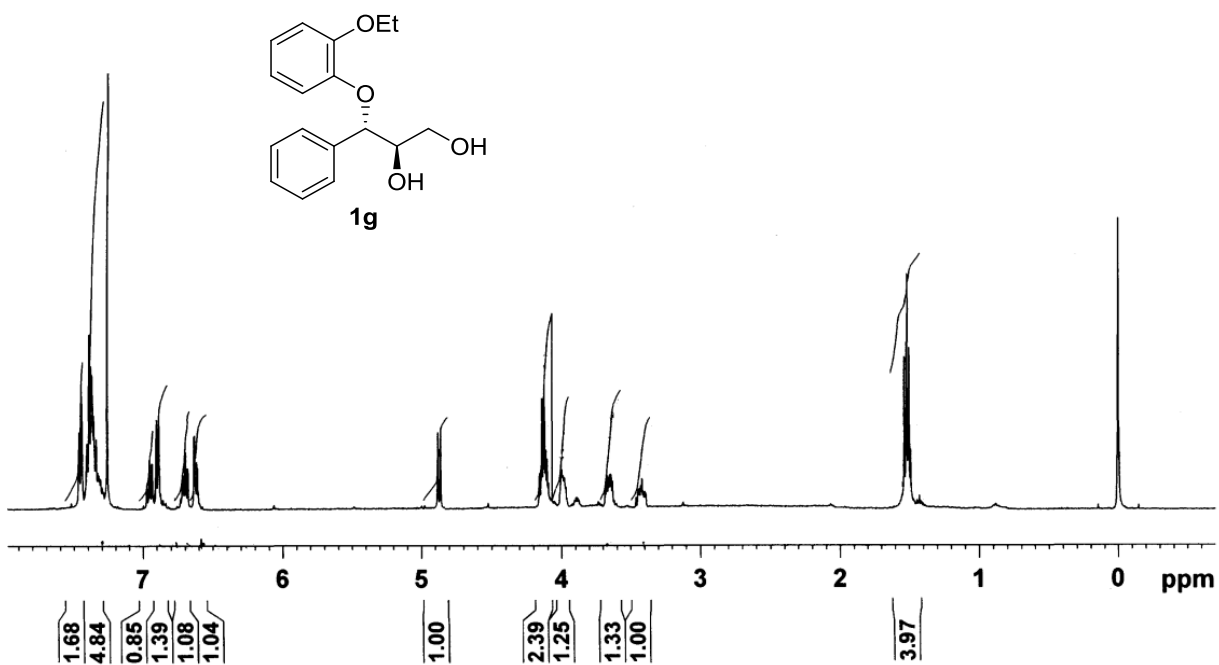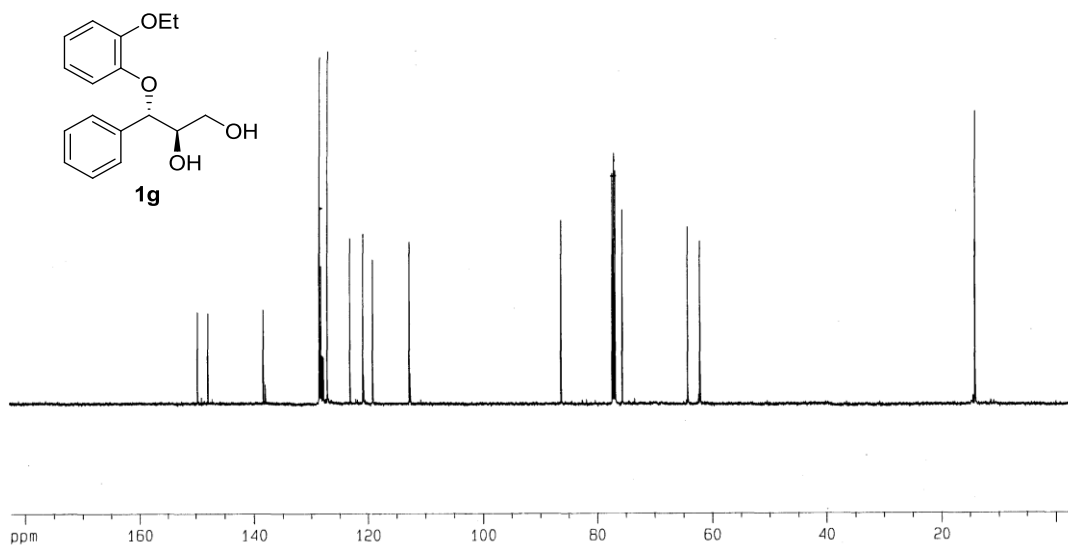

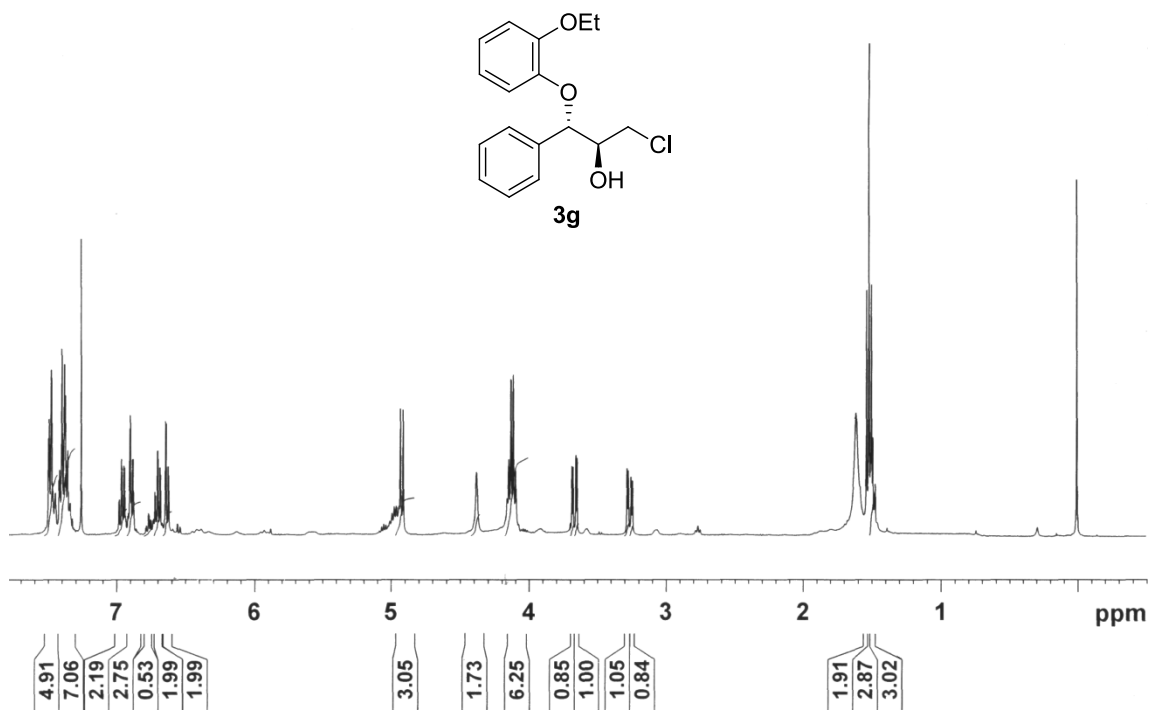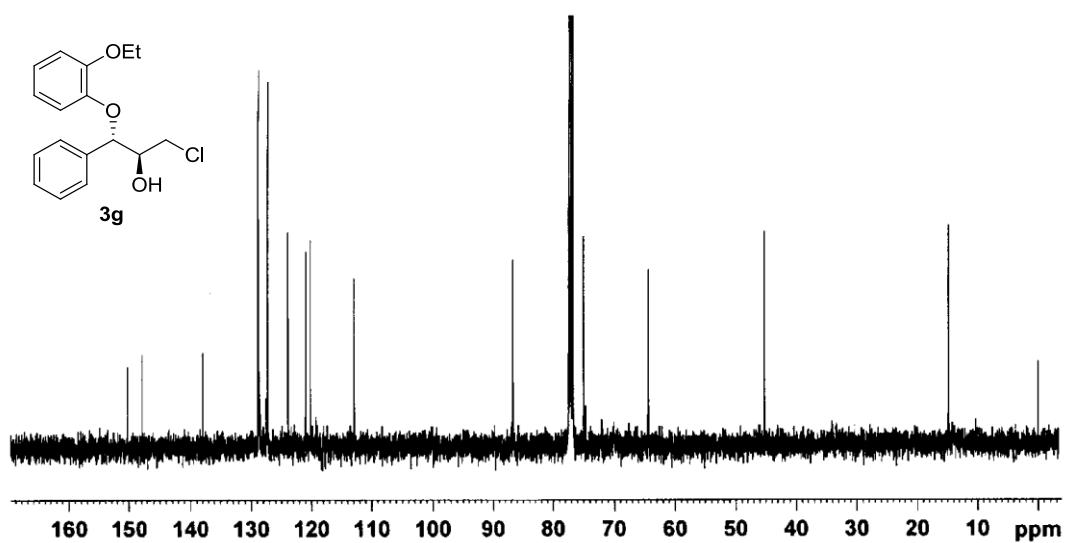



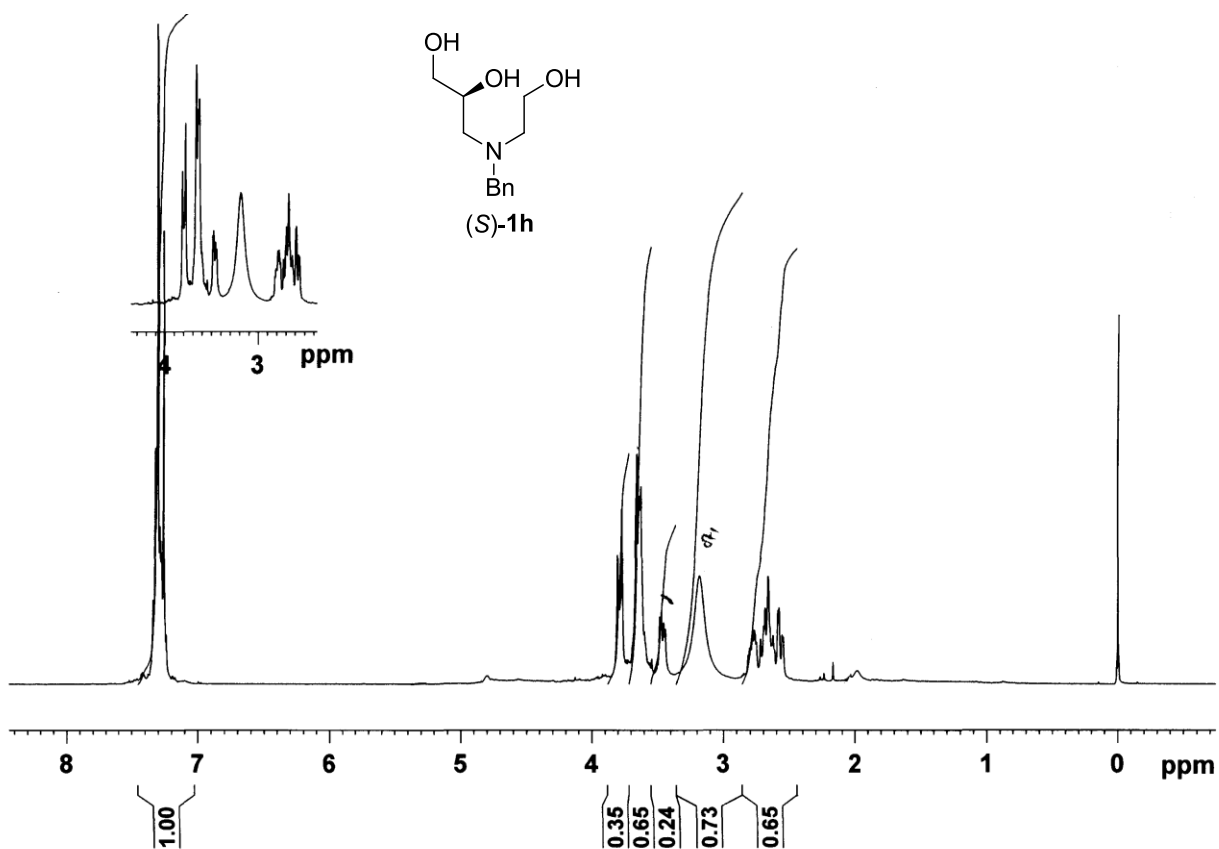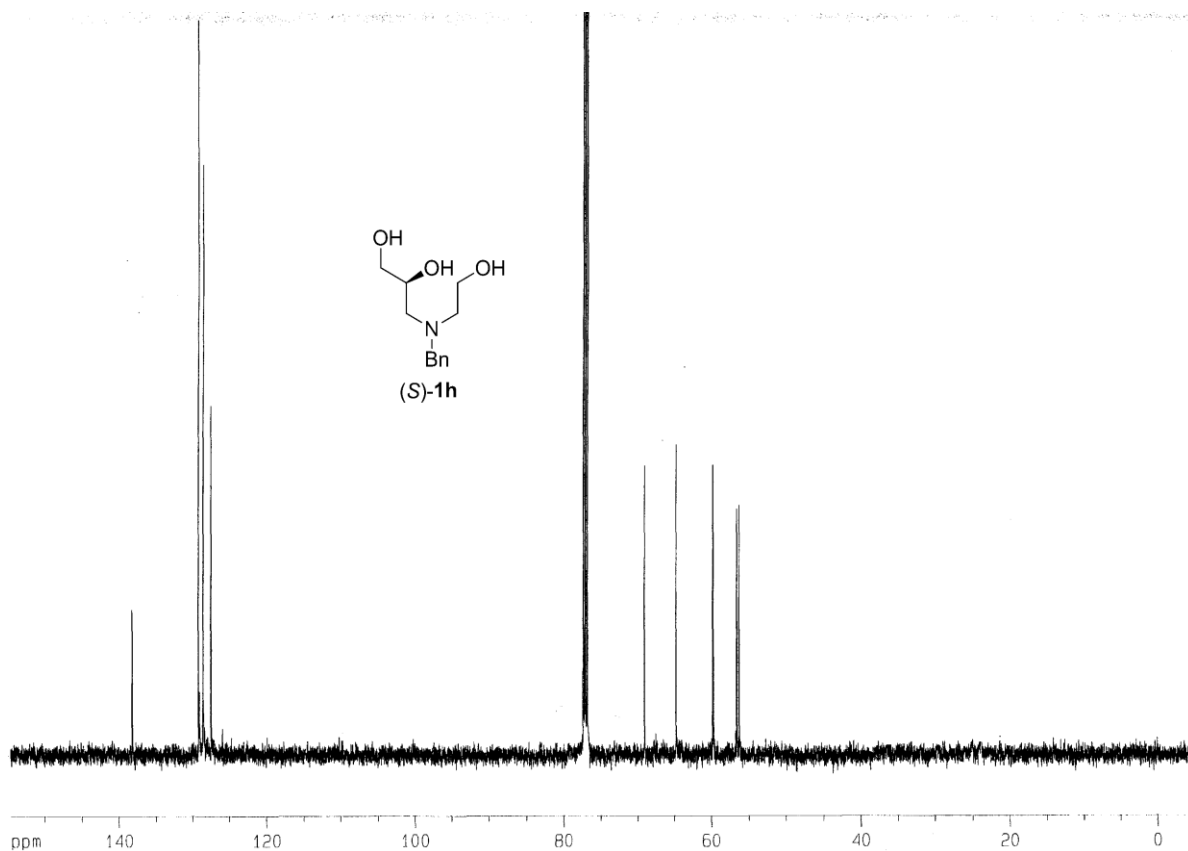

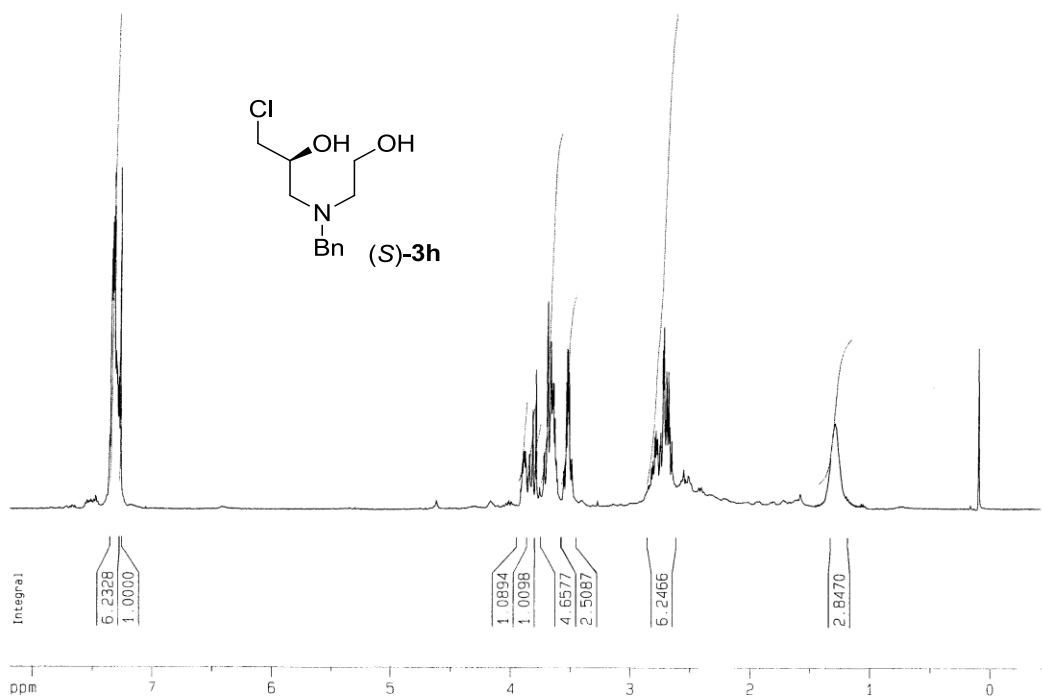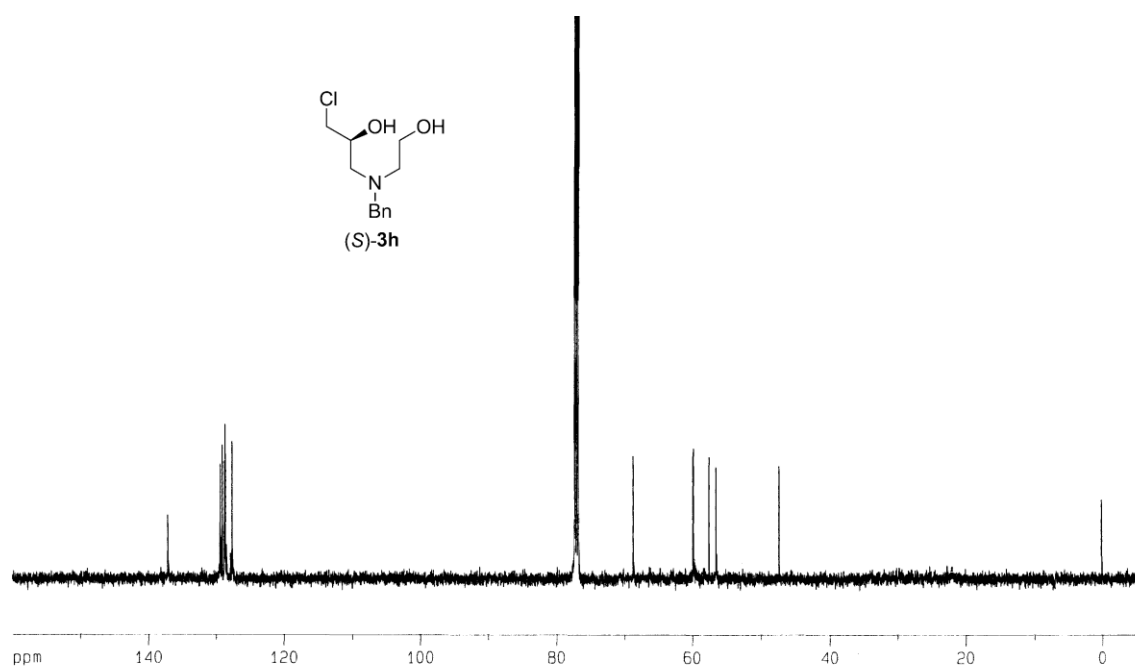

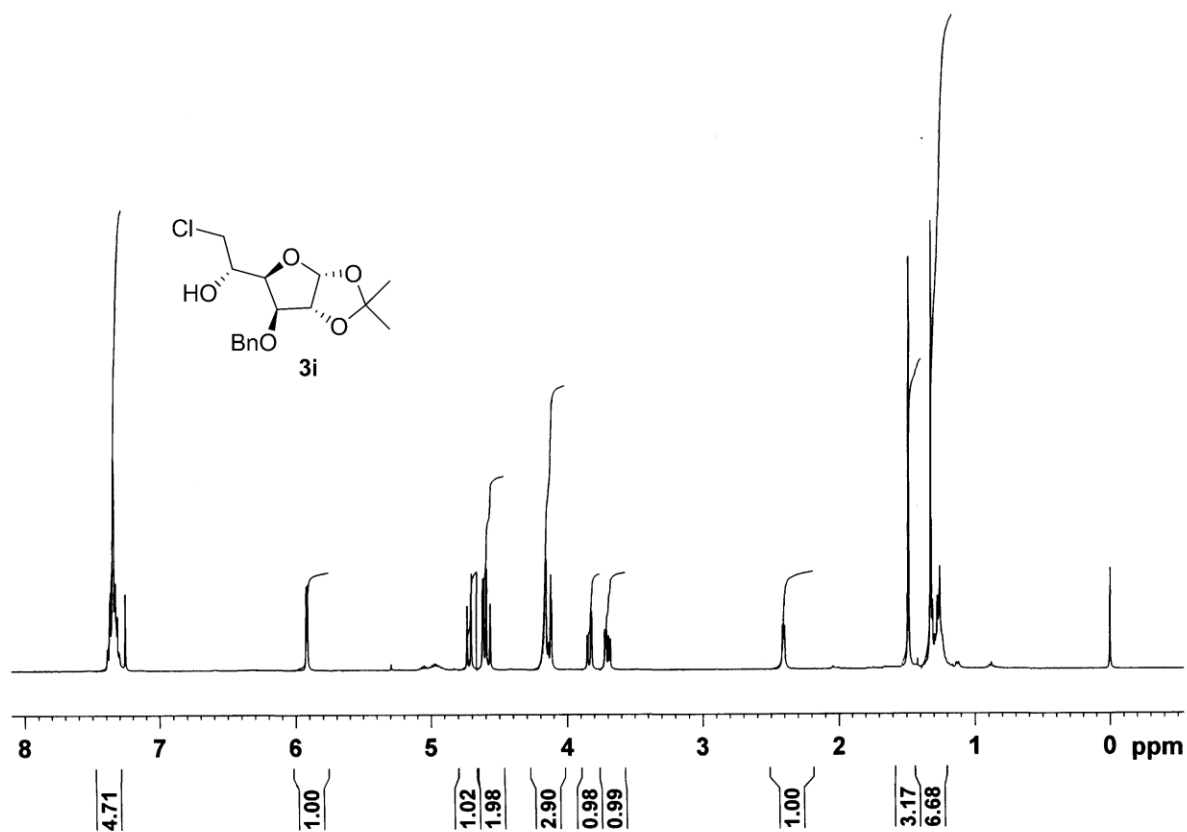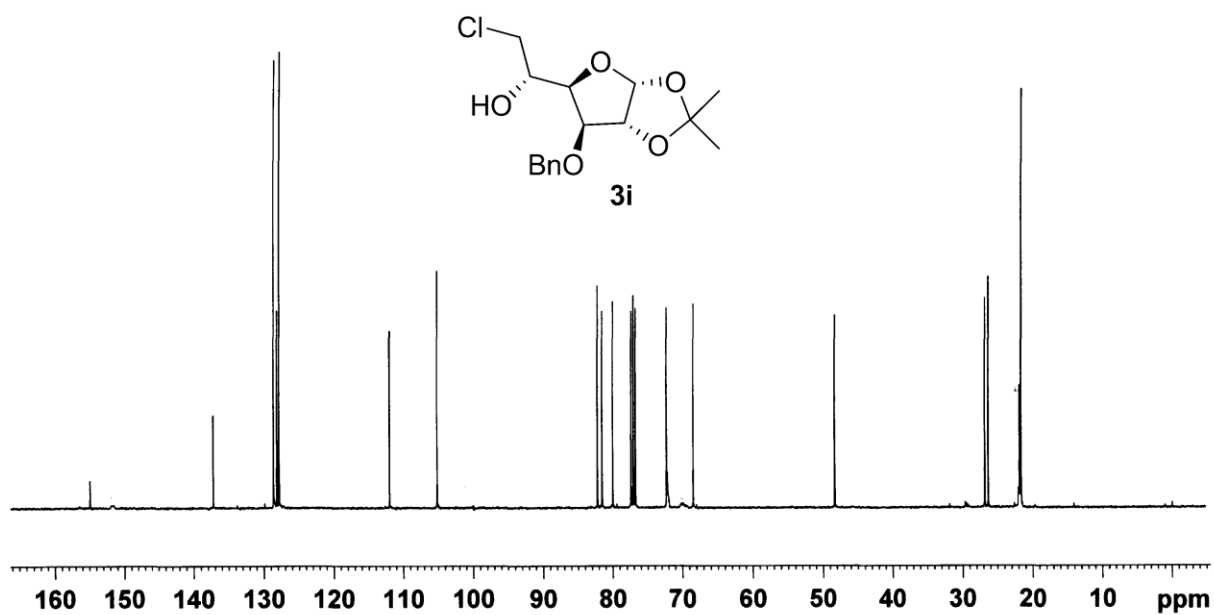

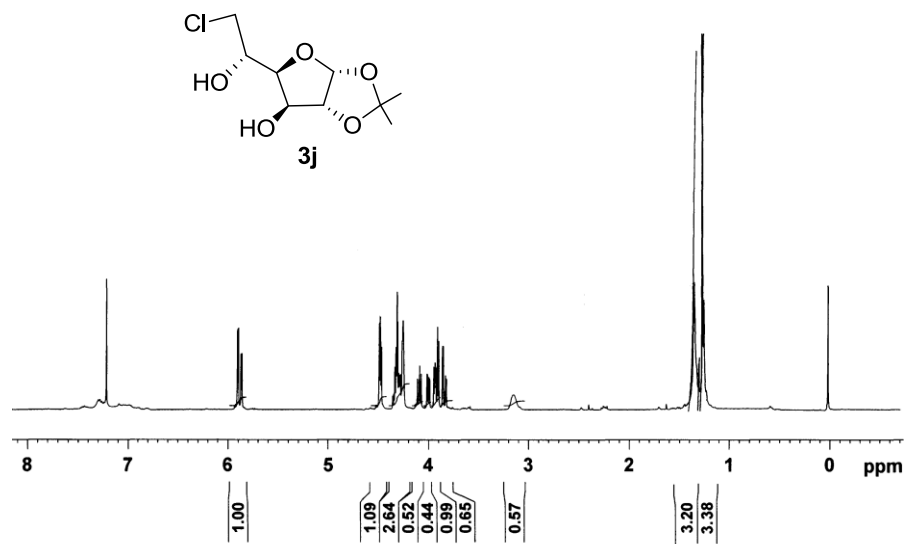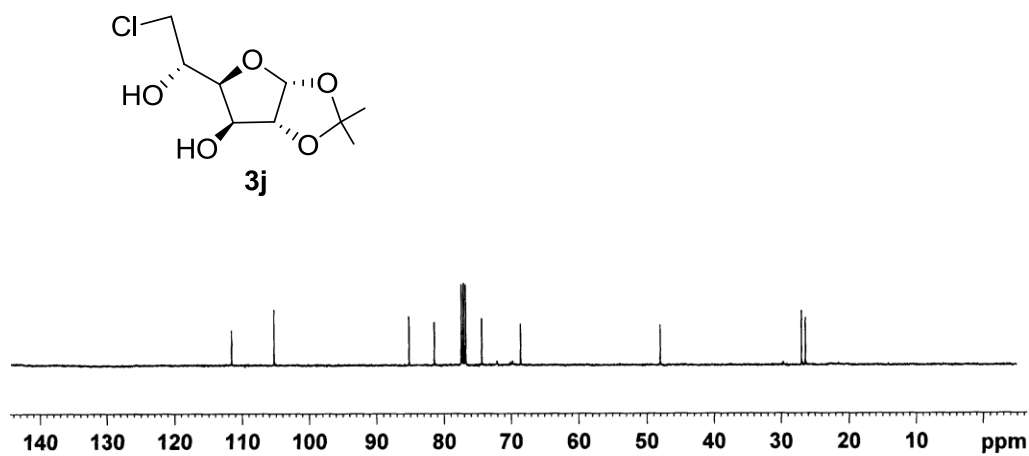

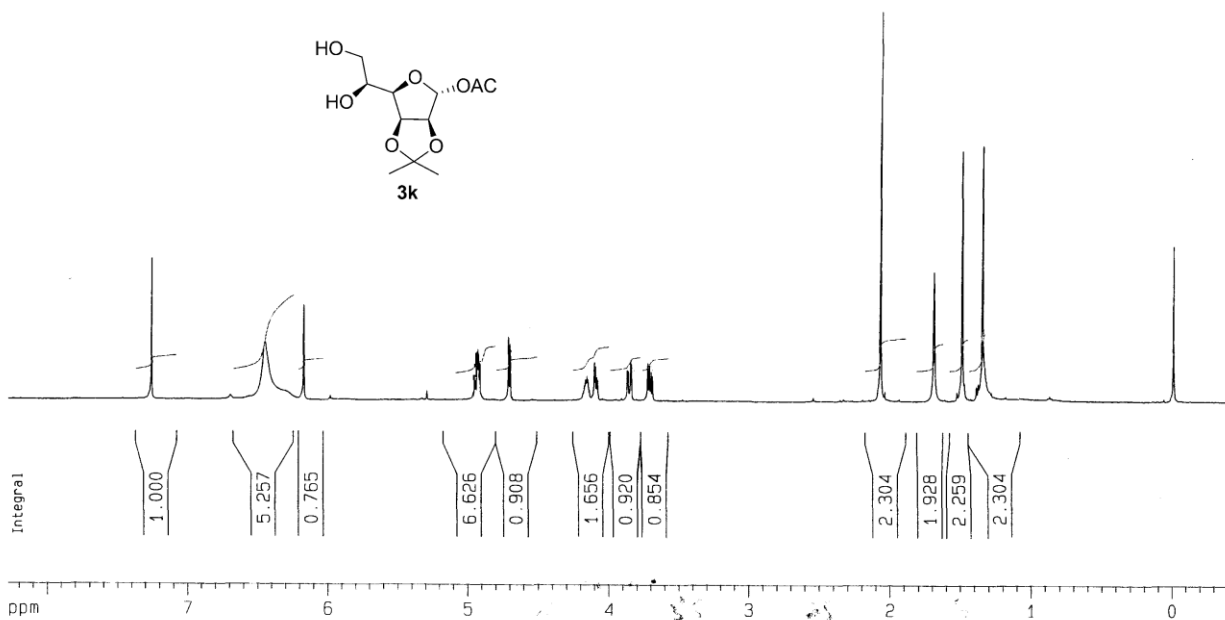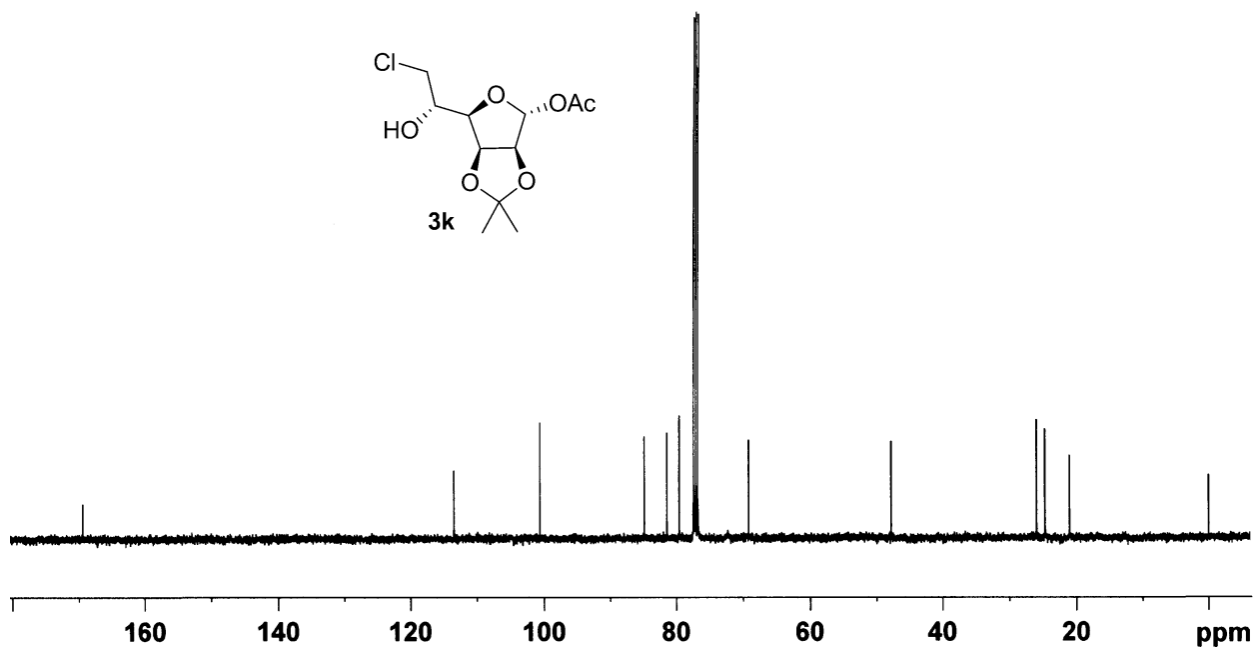

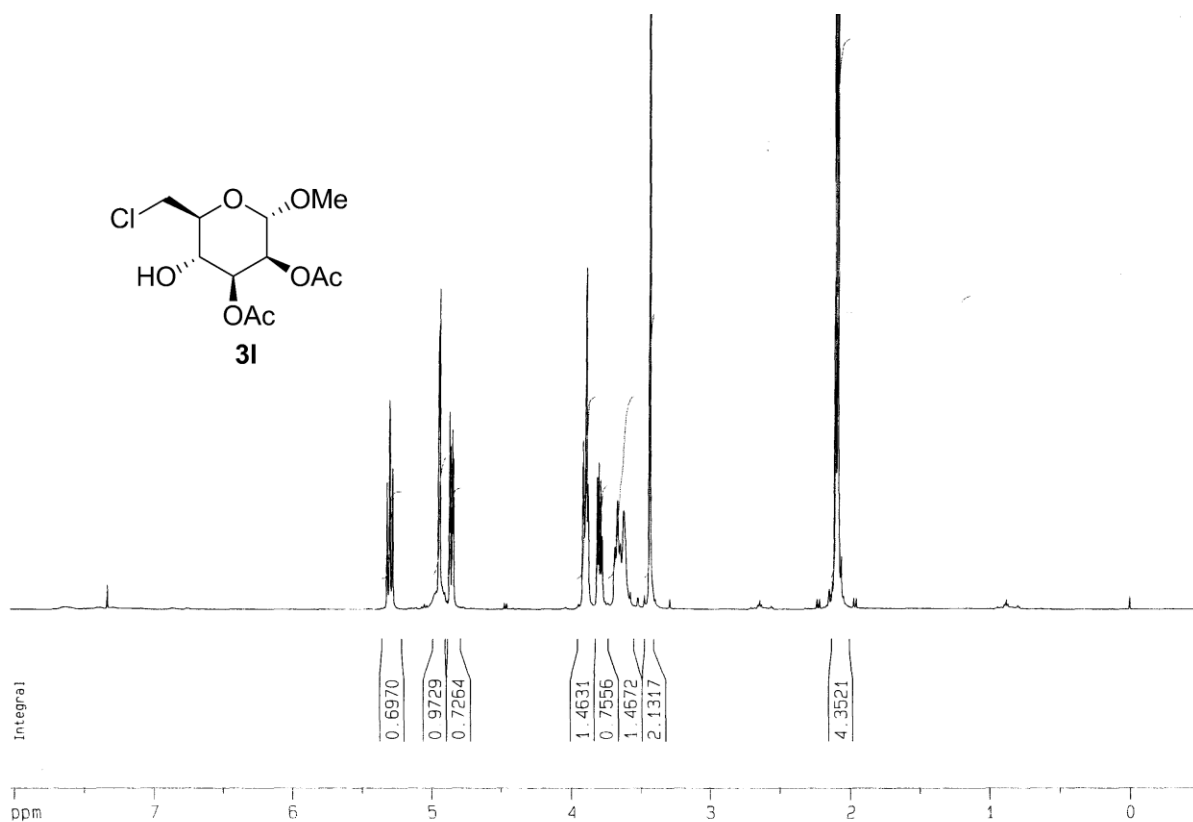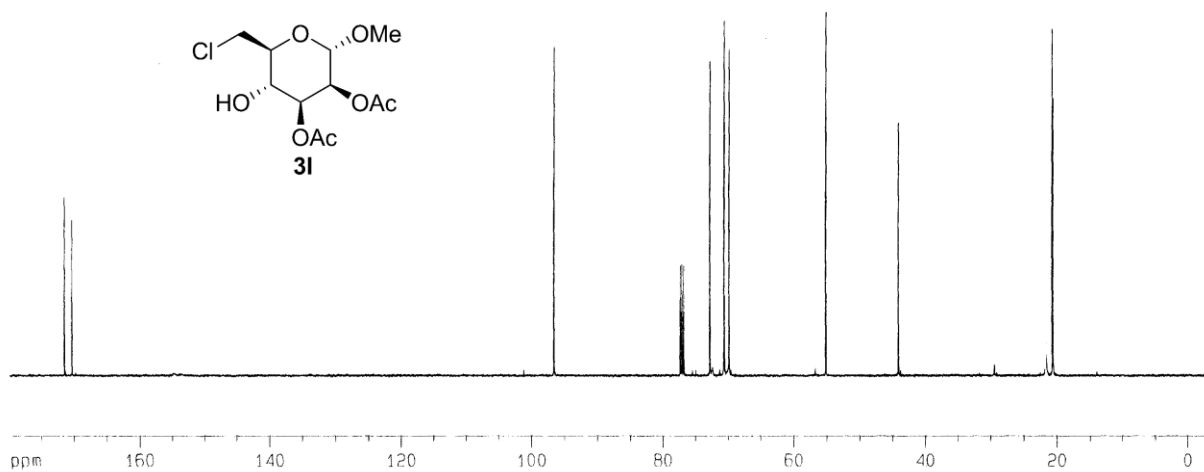

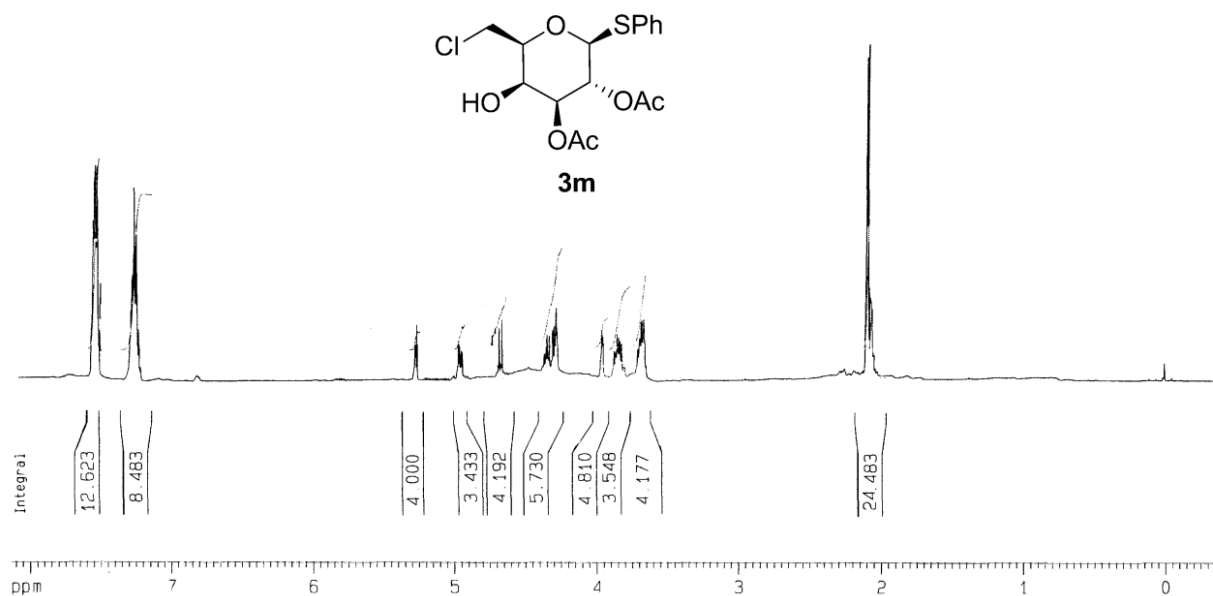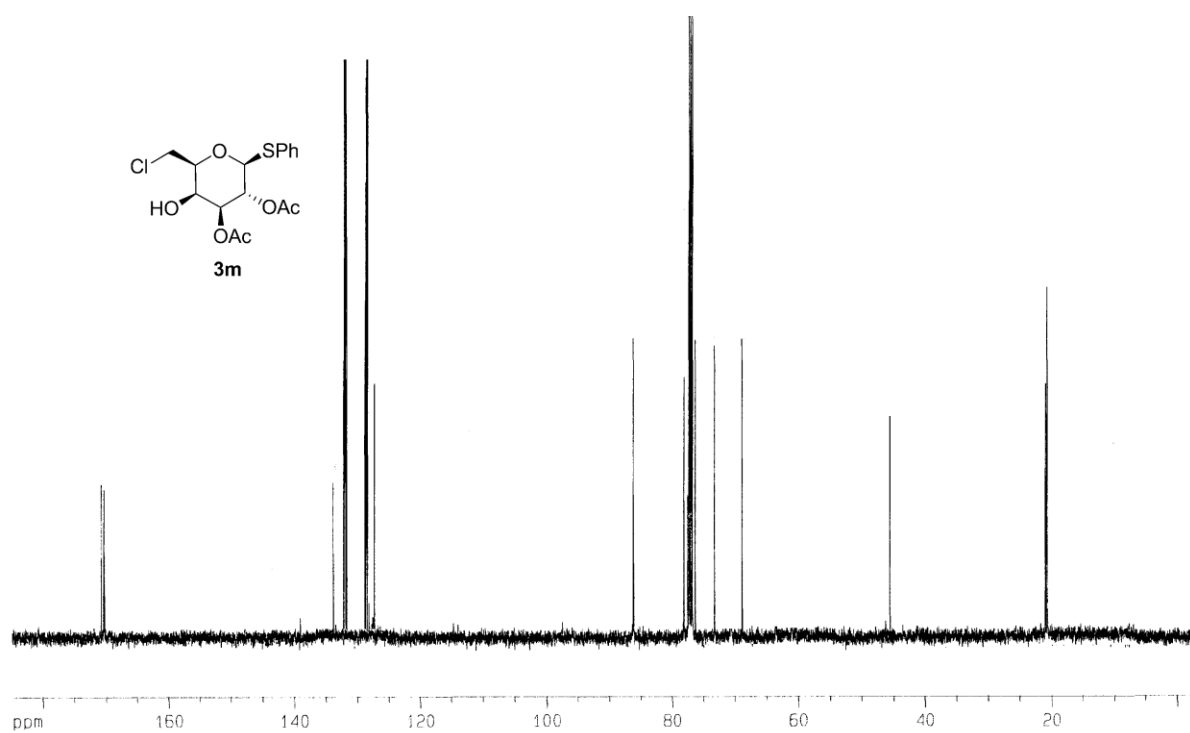

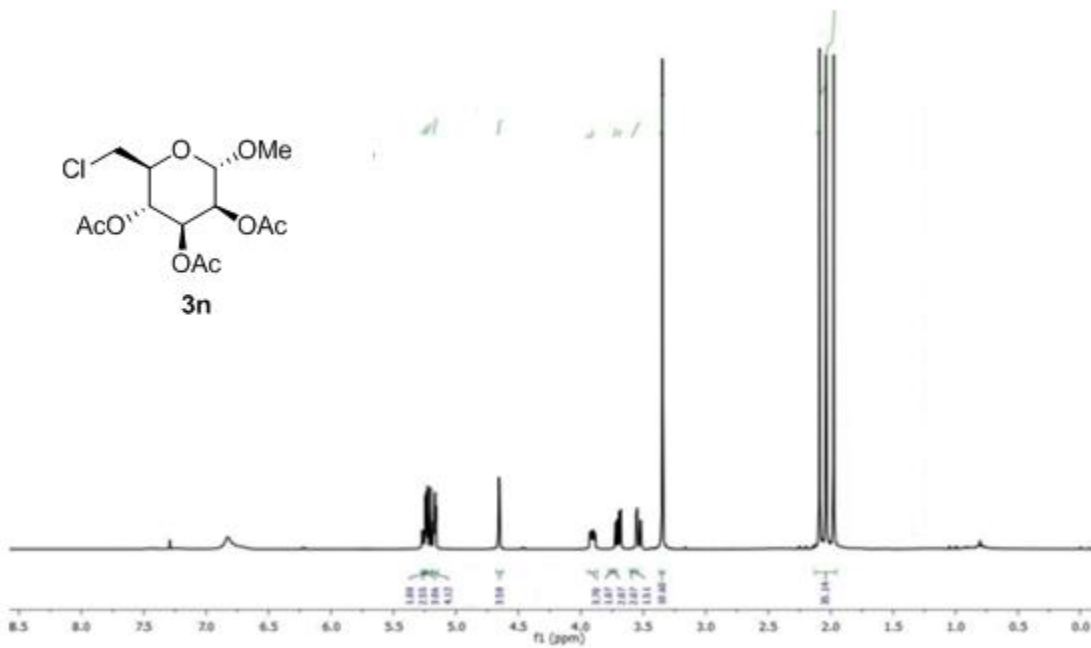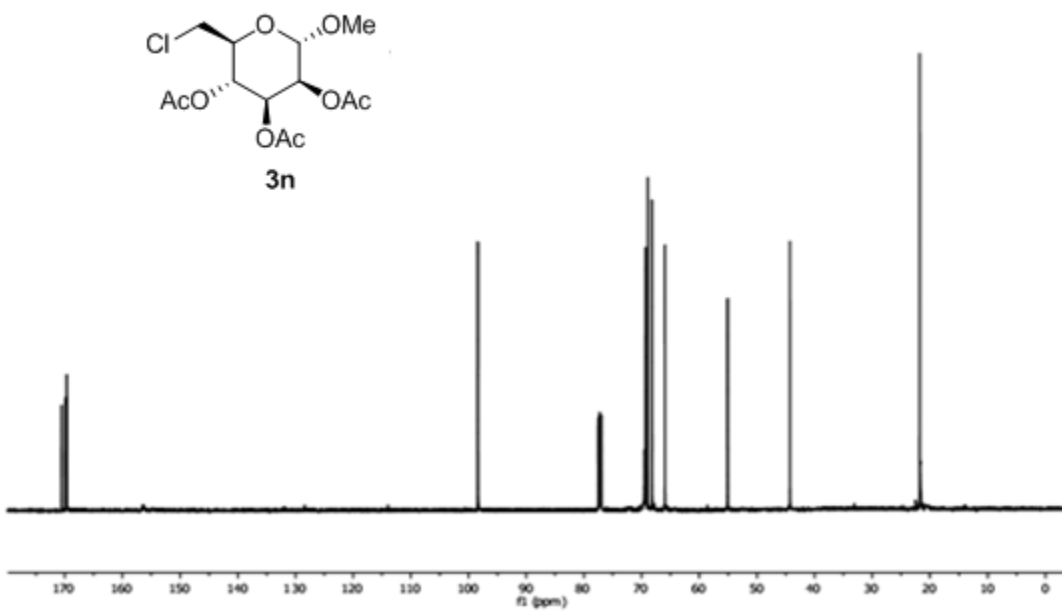



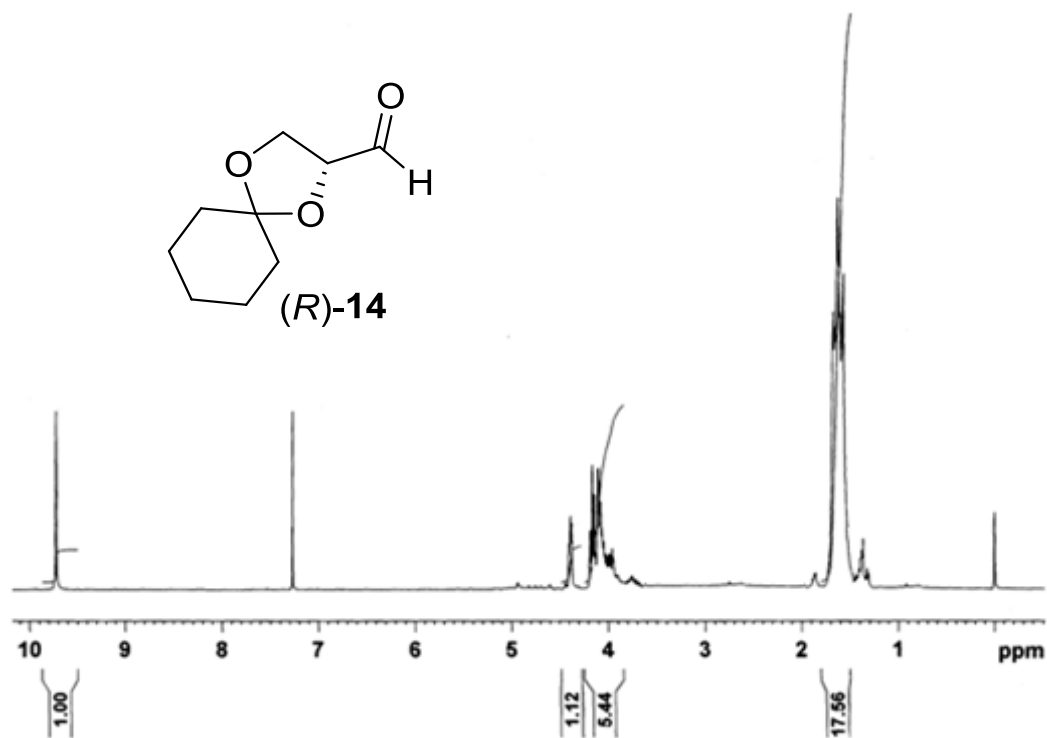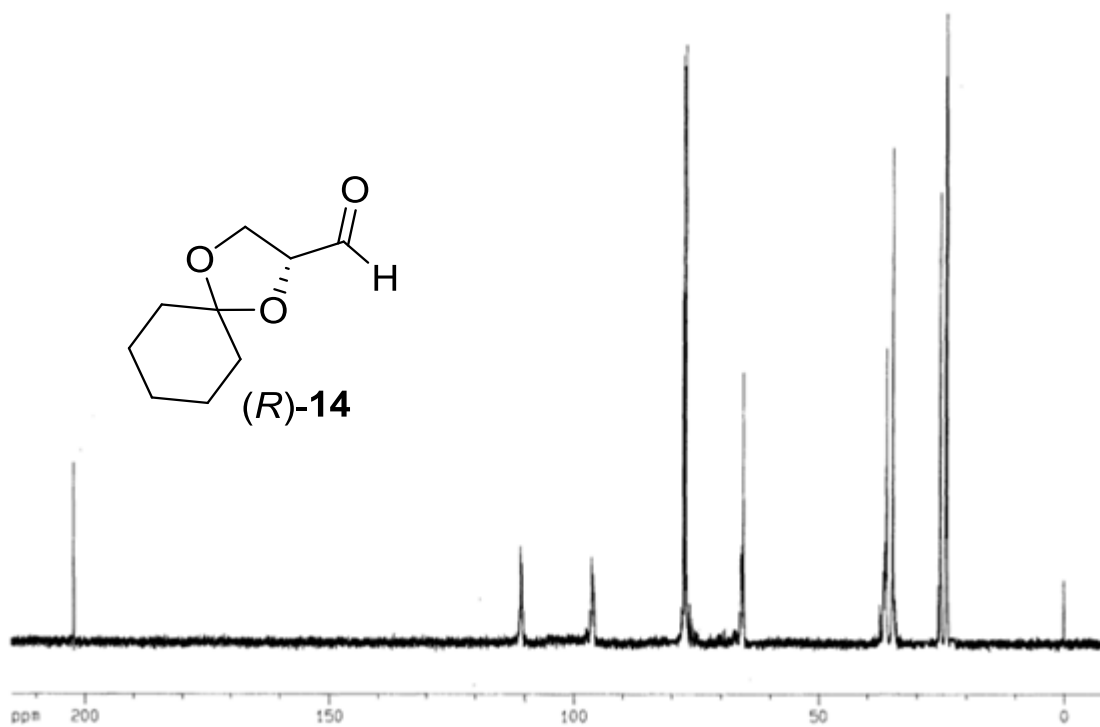

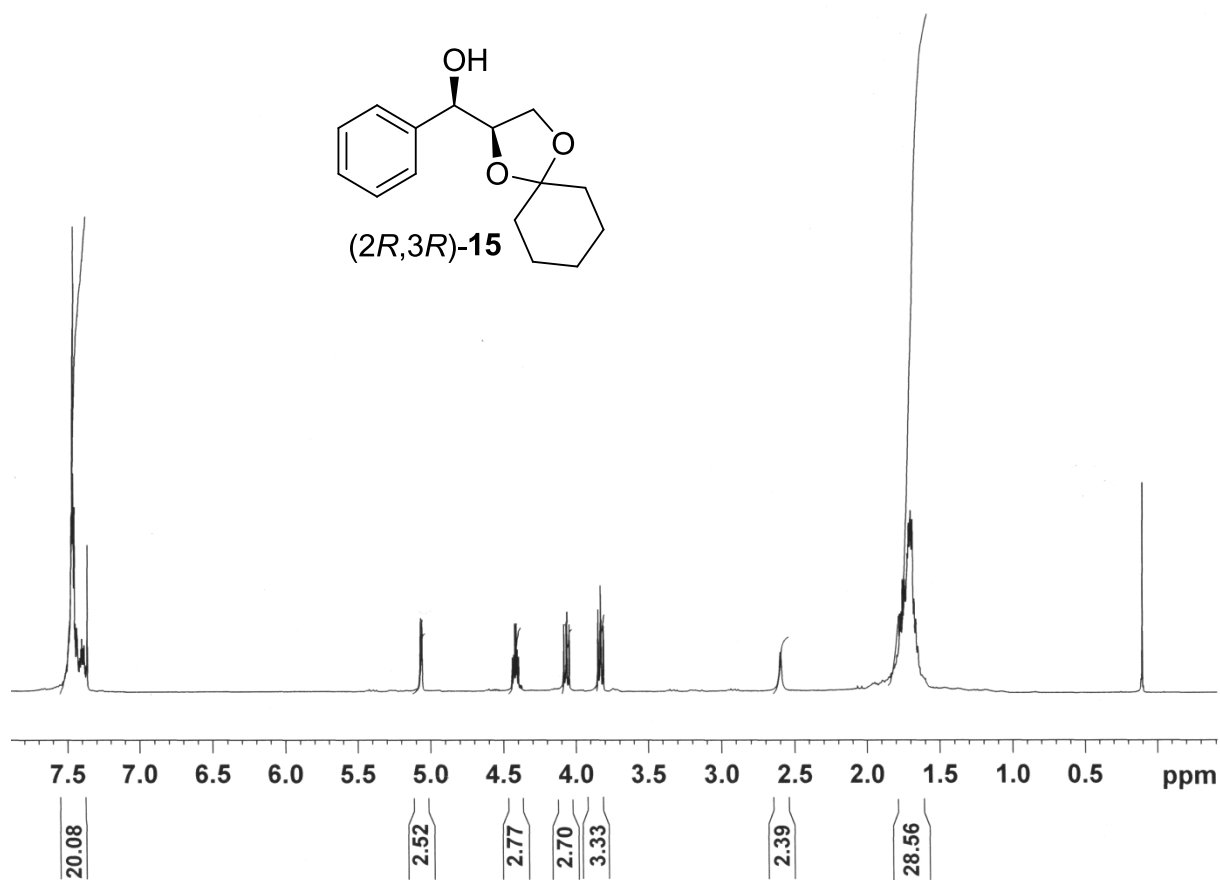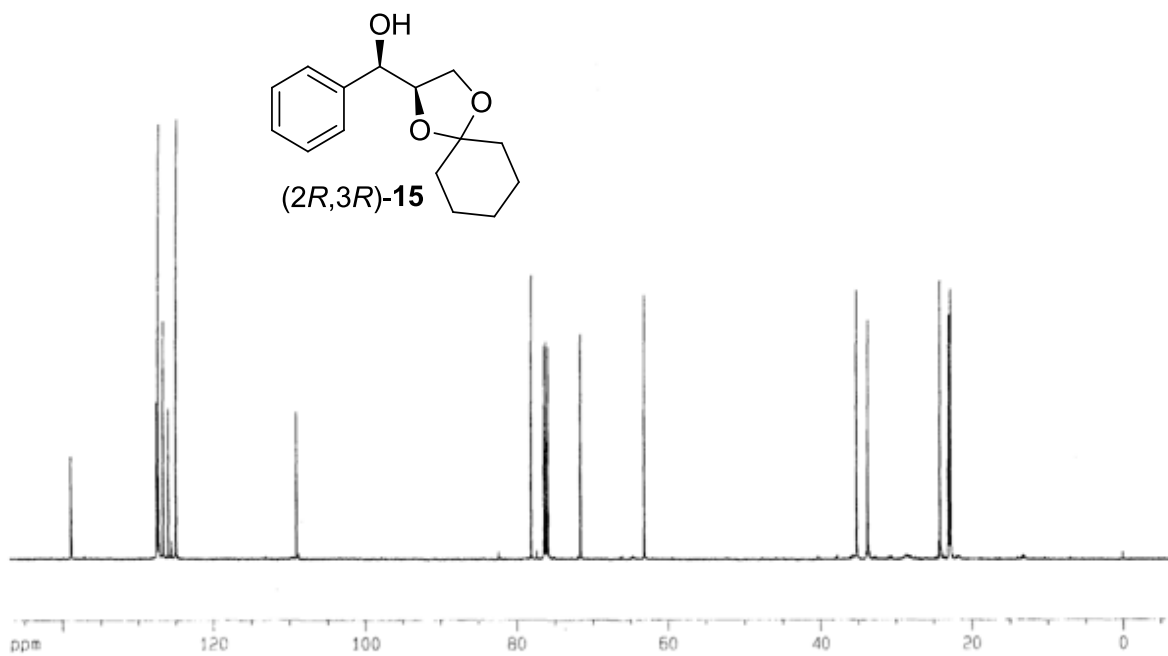

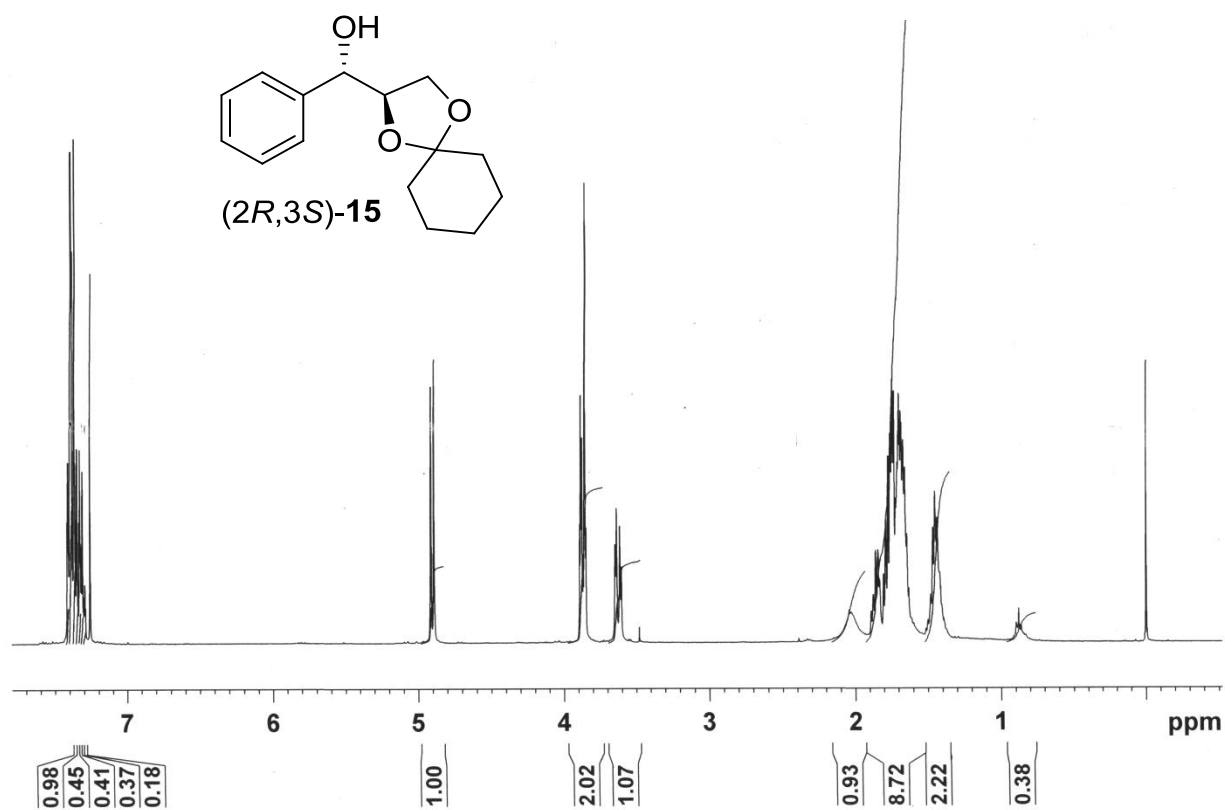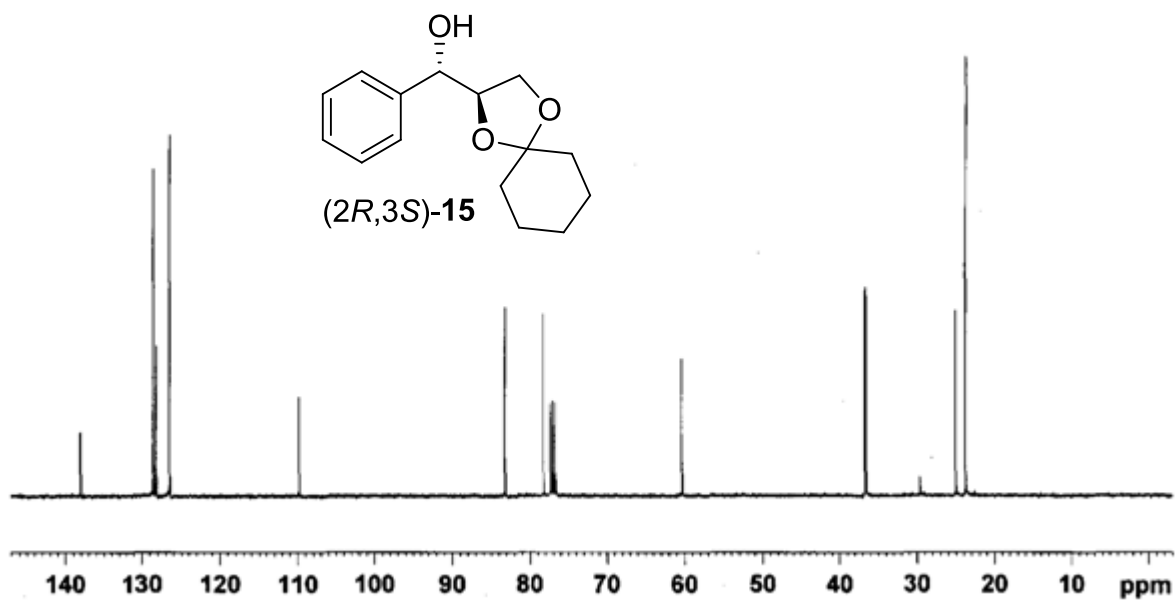

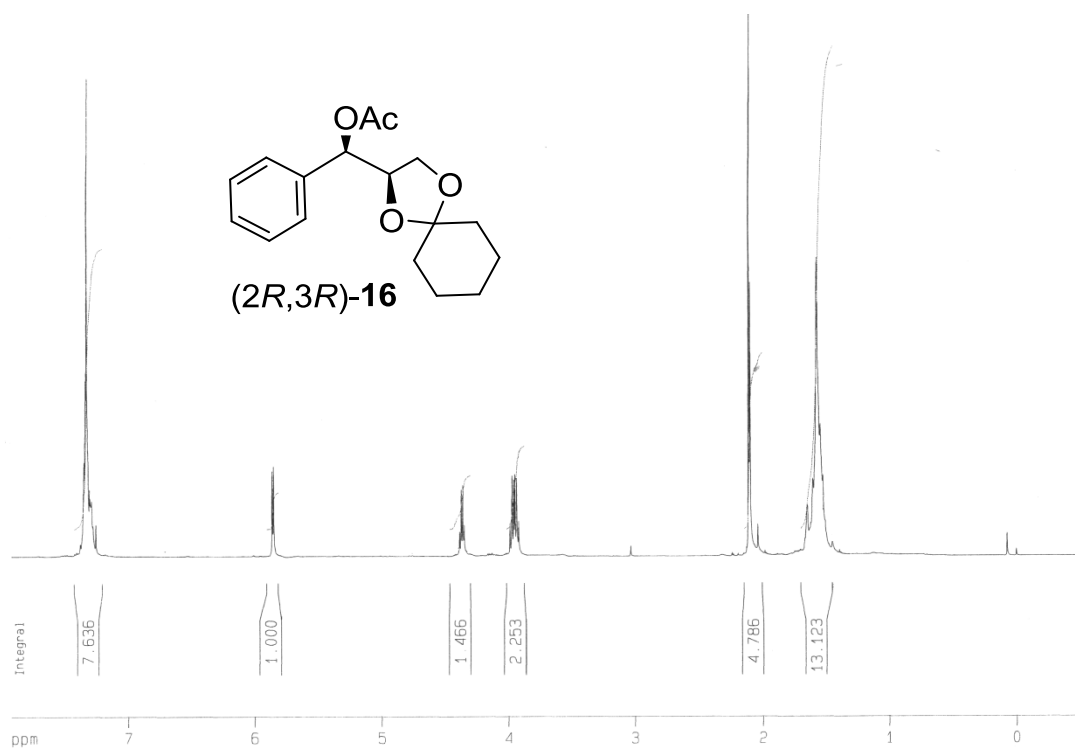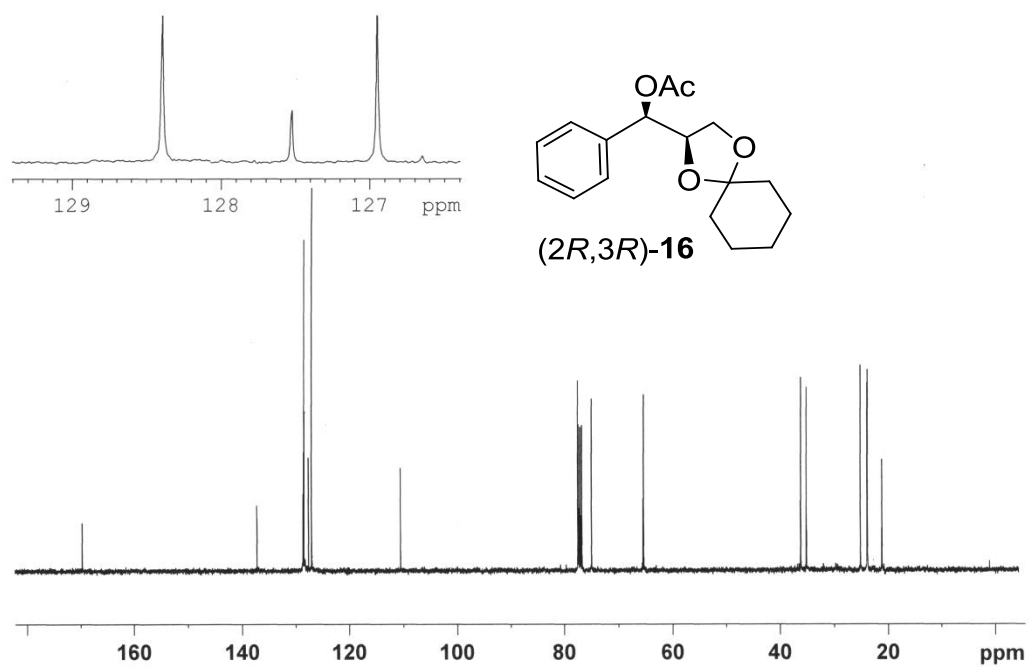

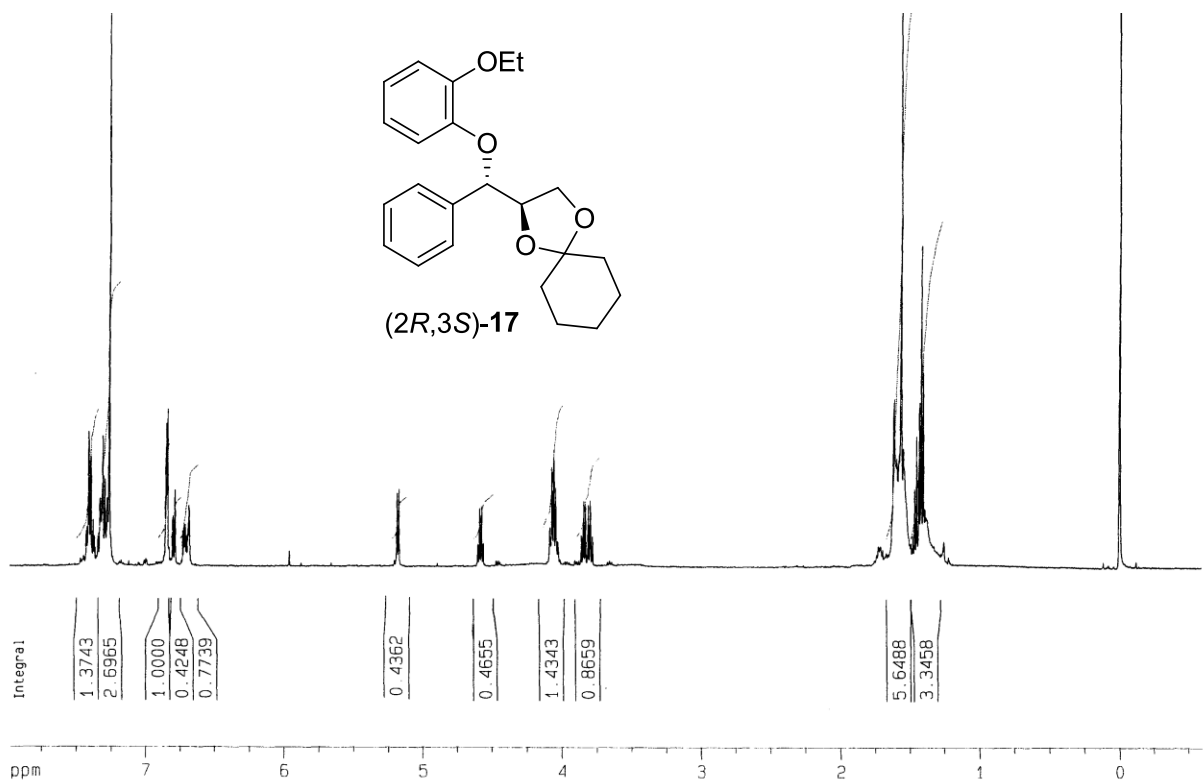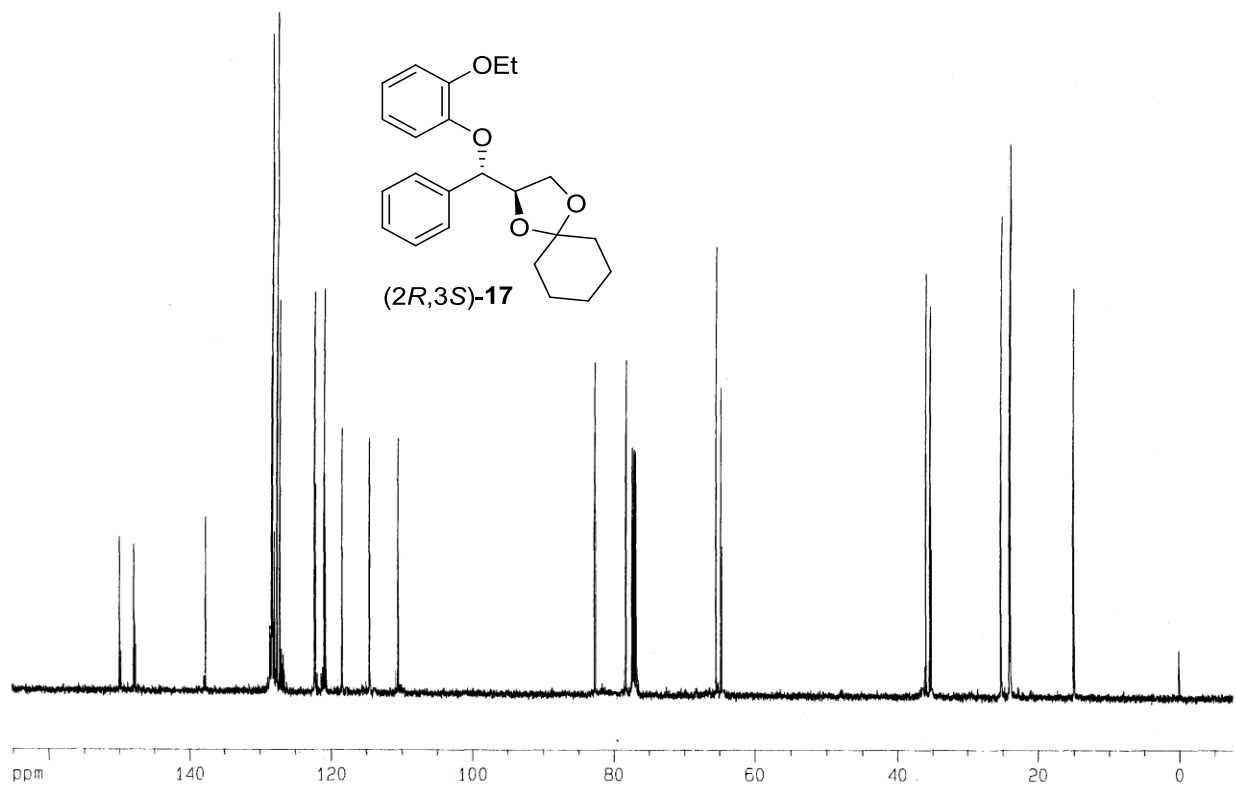

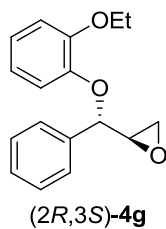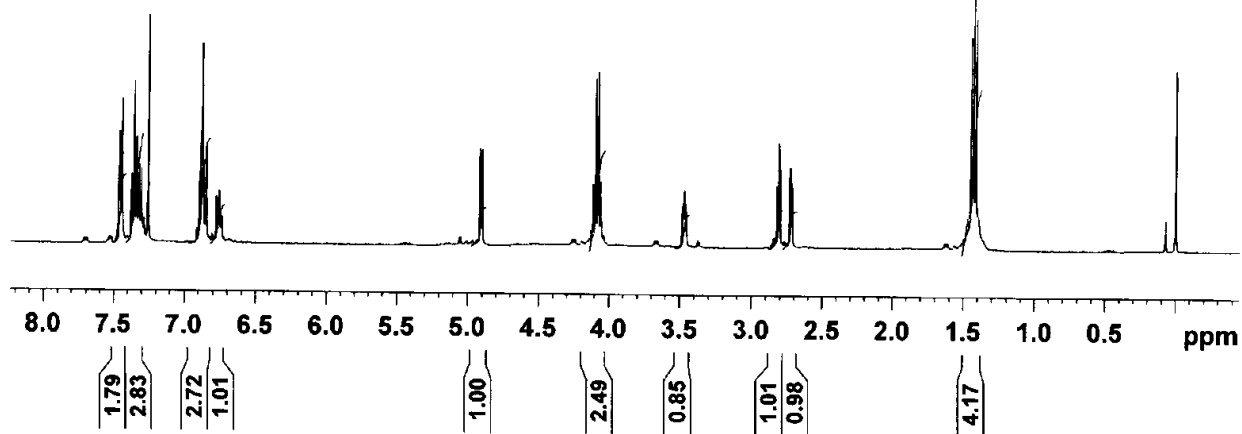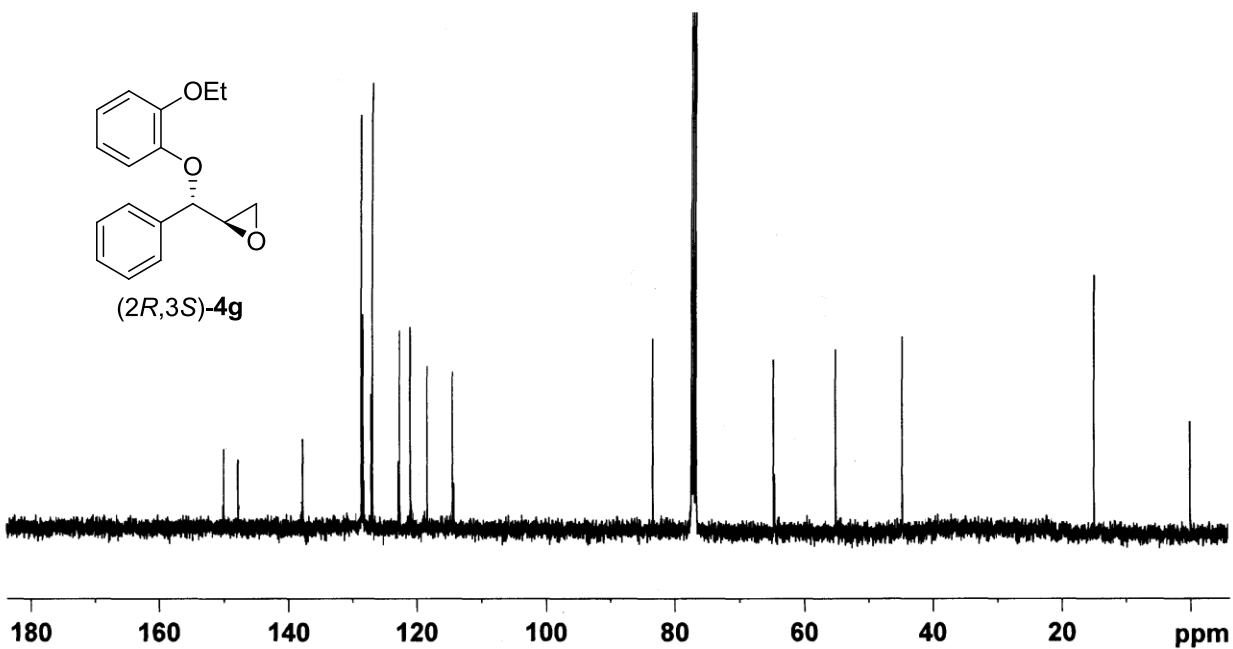

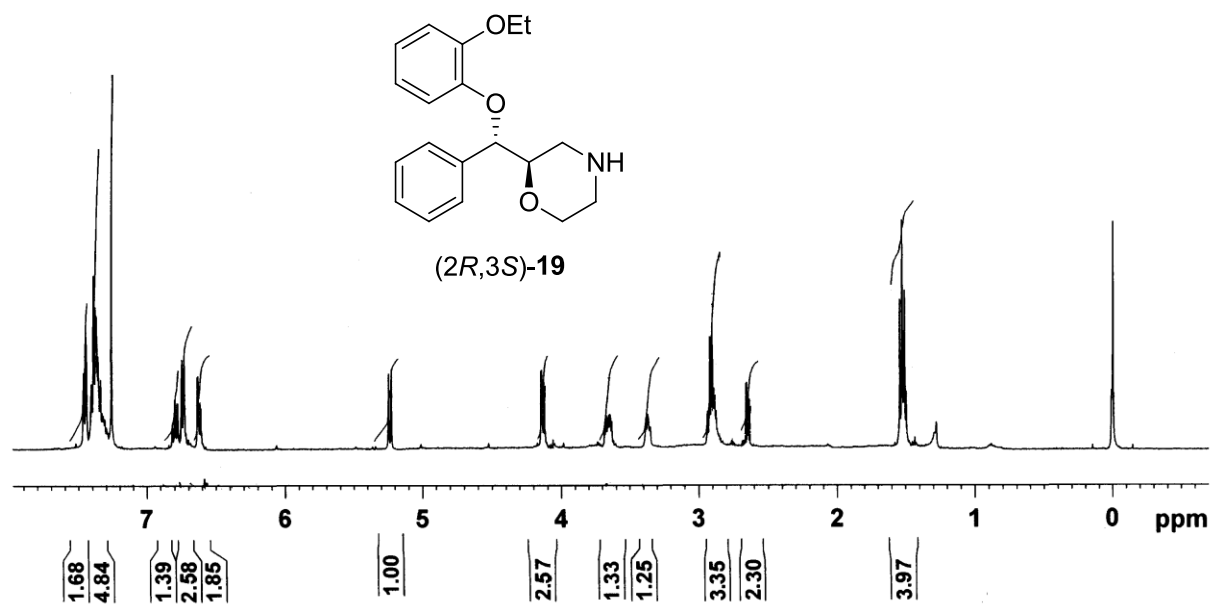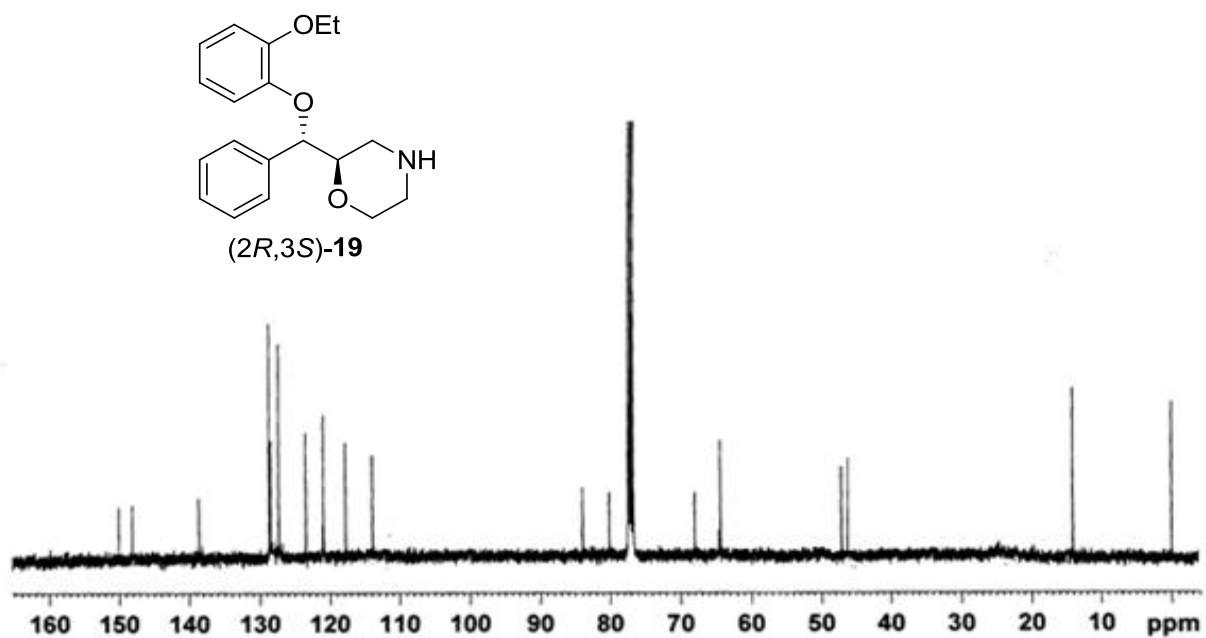

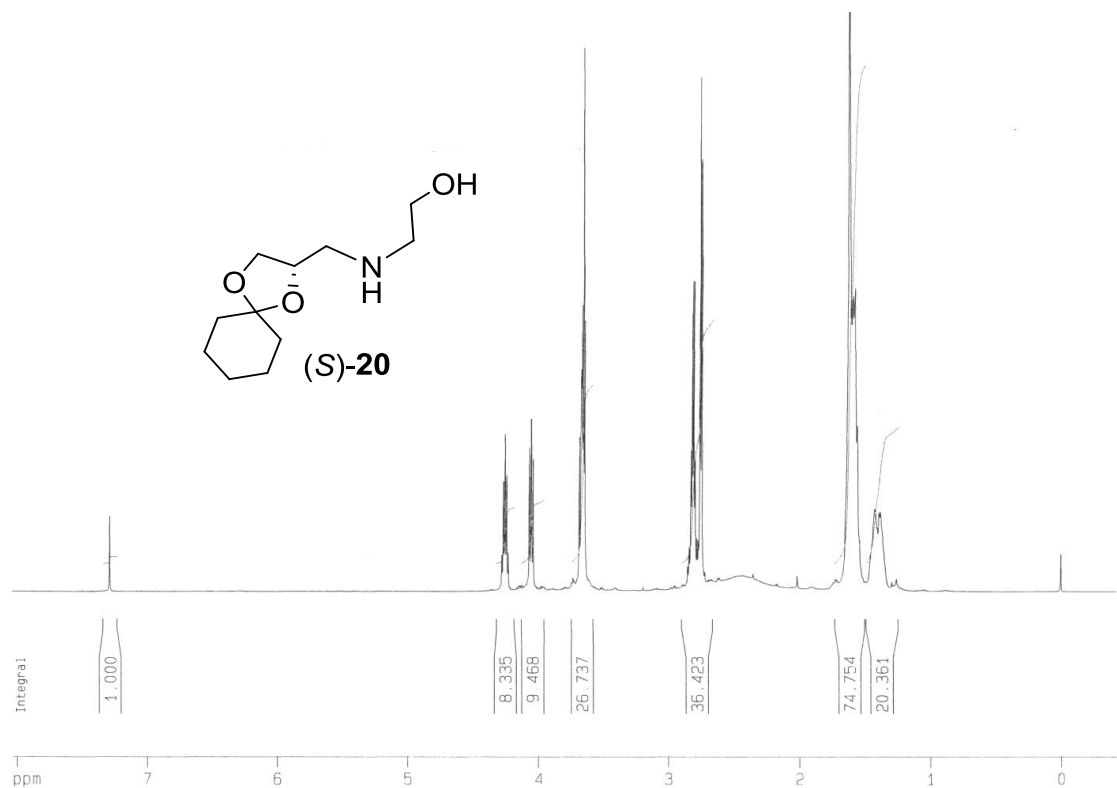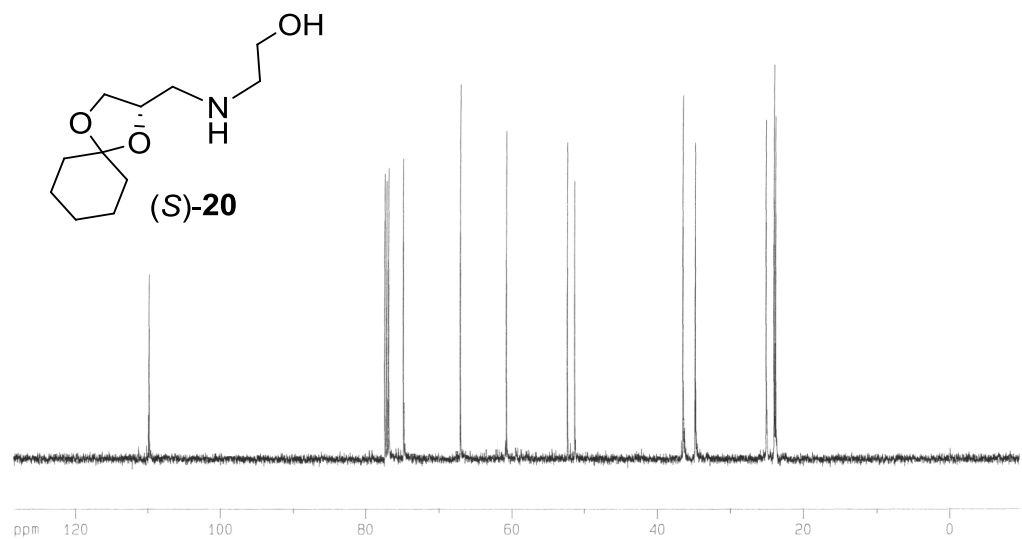



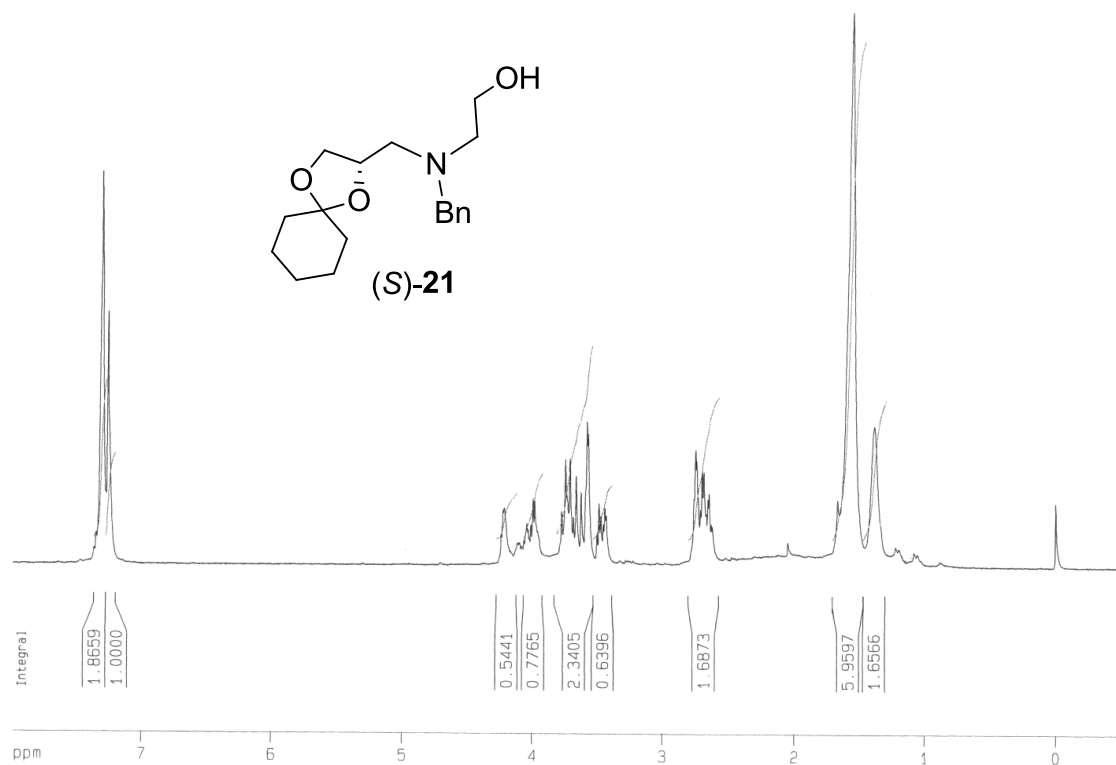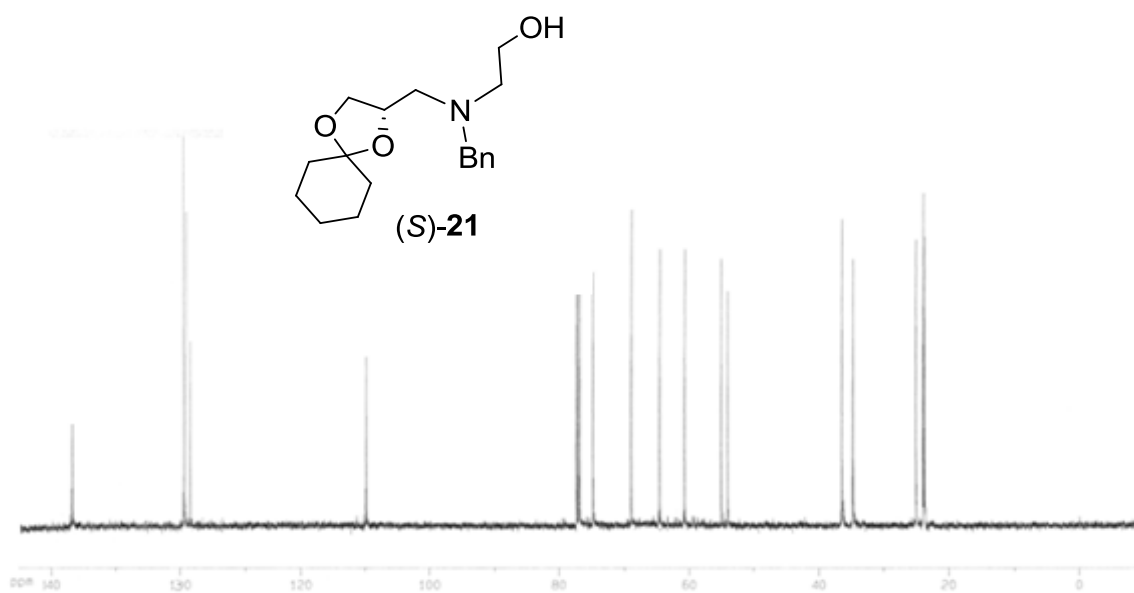

Supplement: c3ob40853a.pdf [file c3ob40853a.pdf]
